# Supplementary material
Source: MDPI journal article supplement (https://www.mdpi.com/2071-1050/12/15/6044)
Supplement: s1 [file s1]

## Sheet: Table S1
Name des Projektes laut Bürgerschaffenwissen	Ort	Projektpartner	Zeitraum	Plattform/Art der Interaktion	Link	Beschreibung; Wörtlich aus dem Absatz: "Worum geht es"	Zielgruppe Prozess eng/breit	Zielgruppe Prozess Begründung und Beschreibung	Zielgruppe Ergebnis eng/breit	Zielgruppe Ergebnis Begründung und Beschreibung	Grad der Aktivierung/Involviertheit gering, mittel, stark	Grad der Aktivierung Begründung und Beschreibung	Grad der Aktivierung/Involviertheit nach Hackley: crowdsourcing, distributed intelligence, participatory science, extreme citizen science	Fokus Bildung, Forschung, Freizeit?	Bildungsaspekt	Forschungsaspekt	Forschungsart	Liebhaber-/Freizeitaspekt	SDG1 Keine Armut	SDG2 Kein Hunger (inkl. Ernährung, Landwirtschaft)	SDG3 Gesundheit/Wohlergehen	SDG4 Hochwertige Bildung	SDG5 Geschlechtergleichheit	SDG6 Sauberes Wasser und Sanitäreinrichtungen	SDG7 Bezahlbare und saubere Energie	SDG8 Menschenwürdige Arbeit und Wirtschaftswachstum	SDG9 Industrie, Innovation, Infrastruktur	SDG10 Weniger Ungleichheiten	SDG11 Nachhaltige Städte und Gemeinden (inklusiv, sicher, widerstandsfähig, nachhaltig)	SDG12 Nachhaltige Konsum und Produktion	SDG13 Maßnahmen zum Klimaschutz	SDG14 Leben unter Wasser	SDG15 Leben an Land (Ökosysteme)	SDG16 Frieden, Gerechtigkeit, starke Institutionen	SDG17 Partnerschaften zur Erreichung der Ziele
Gemeinsam Gedächtnis erforschen	Deutschland	neotiv GmbH, Otto-von-Guericke Universität Magdeburg, Deutsches Zentrum für Neurodegenerative Erkrankungen DZNE	ab Dezember 2018	App	https://www.buergerschaffenwissen.de/projekt/gemeinsam-gedaechtnis-erforschen	Gedächtnisstörungen sind wichtige Indizien für eine Alzheimererkrankung. Doch die genaue Messung von Gedächtnisstörungen ist eine große wissenschaftliche und medizinische Herausforderung und gelingt derzeit nur unzureichend. Das liegt daran, dass die Gedächtnisleistung Schwankungen unterliegt, die unabhängig von Alzheimer durch Lebensstilfaktoren wie Stress, Schlaf oder Ernährung und durch divers…	breit	Alle Personen ab 18 Jahren mit Smartphone	eng	Vorsorgeuntersuchungen für Demenzerkrankungen	wenig bis mittel	Fragebogen in App ausfüllen, mehr Feedback und Anregungen über App sind möglich, um Forschungsschwerpunkte mit zu beeinflussen	distributed intelligence	Forschung für Gesundheit (anwendungsorientierte Forschung)	Bürgerinnen und Bürger für dieses wichtige und manchmal schwer zugängliche und emotionale Thema zu sensibilisieren und zu informieren	Wenn Forscherinnen und Forscher diese Schwankungen der Gedächtnisleistung im Alltag besser verstehen, werden sie in der Lage sein, genaueres Verfahren zur Messung von Gedächtnisstörungen zu entwickeln. Genau um diese Alltags-Schwankungen geht es in dieser Studie. Der erste Forschungsschwerpunkt liegt auf dem Einfluss des Schlafverhaltens und von Grippeerkrankungen auf das Gedächtnis	Angewandte Forschung	spielerische Gedächnistests			Gesundheit: Insb. mehr über Altsheimererkrankungen erfahren, frühzeitig erkennen
KulTour Cloppenburg	Niedersachsen und Bremen	Universität Vechta, Bundesanstalt für Landwirtschaft und Ernährung	ab Januar 2018	beteiligungsbasierte Veranstaltungen, bei denen Daten zur Orts- und Kulturgeschichte gesammelt werden und über Rundgänge entschieden wird	https://www.buergerschaffenwissen.de/projekt/kultour-cloppenburg	Regionalgeschichte hat häufig eine angestaubte Bedeutung und erlangt nur selten das Interesse der – vor allem jungen – Bevölkerung. Das Projekt „KulTour Cloppenburg“ zielt darauf ab, die lokale Bevölkerung in Cloppenburg zu einer wissenschaftlichen Auseinandersetzung mit den ortshistorischen Besonderheiten zusammenzubringen und auf diese Weise die Pflege und den Erhalt des kulturellen Erbes in de…	breit	lokale Bevölkerung in Cloppenburg allgemein	breit	Für alle nutzbare Tour: Im Zentrum steht die gemeinsame Entwicklung einer digitalen Stadttour, die relevante Bestandteile der Ortskultur und -geschichte beinhaltet und als frei zugängliche Open-Source Anwendung der interessierten Öffentlichkeit zur Verfügung stehen wird.	hoch	entwickeln Stadttour, bringen ihr Wissen ein, was Stadtkultur ausmacht (Orte, Sprache, Kunstwerke, lokalgeschichliche Ereignisse, Familienbiografien)	distributed intelligence	Bildung, Freizeit	Bevölkerung für Regionalgeschichte sensibilisieren, Pflege und Erhalt des kulturellen Erbes	Erhobene Daten Anstoß für wissenschaftliche Auseinandersetzung mit der Stadt, Grundlage für weitere Forschungarbeiten, Seminare	Angewandte Forschung	Über Stadt, Familiengeschichten, Kultur, Sprache sprechen, Rundgang entwickeln				Bildung über lokale Geschichte							Beitrag zu Identifikation mit der Stadt?
Ampel-Pilot	Europa	Forschungsinstitut für Augenheilkunde, Universität Tübingen, Fakultät für Informatik, Hochschule Augsburg	ab September 2018	App	https://www.buergerschaffenwissen.de/projekt/ampel-pilot	Nur 10-12 Prozent der Fußgängerüberwege in Deutschland sind mit Ampeln mit akustischen oder taktilen Signalgebern ausgestattet, welche die Rot- und Grünphasen auch für Sehbehinderte erkennbar machen. Aber selbst bei diesen Ampeln können die Signale bei erhöhtem Verkehrsaufkommen und somit lauten Umgebungsgeräuschen nur schwer erfasst werden. Dieser Problematik hat sich eine Arbeitsgruppe des Fors…	breit und eng	Alle Personen mit Smartphone, bei Programmierung nur alle Personen mit Programmierkenntnissen	eng	Sehbehinderte Personen, die Ampel-Erkennungsapp nutzen können	wenig bis mittel	Aufnahme von Fotos von Ampeln in einer App. Auch möglich, an Programmierung weiterzuarbeiten	distributed intelligence	Forschung		Angewandte Forschung, die Ampel-Erkennungssysetm per App verbessert, die sehbehinderte Menschen nutzen können	Angewandte Forschung				X						X
Wildkatze-Totfundmonitoring	Deutschland	Retscheider Hof e.V.	ab Januar 2015	Fotos mit Verdachtsfällen von Toten Wildkatzen mit Orts-Koordinaten per E-Mail, WhatsApp, Soziale Medien oder Webseite schicken, danach wird weiteres Vorgehen abgesprochen, Identifikatonshilfe auf www.retscheider-hof.de, Meldungen auf totfund.de. Außerdem Schulungen und Online-Seminare	https://www.buergerschaffenwissen.de/projekt/wildkatze-totfundmonitoring	Bundesweit beteiligen sich tausende ehrenamtliche Helfer*innen an der Erfassung von Totfunden bei Katzen, die in speziellen, moderierten Gruppen und Foren eingestellt werden, um die Besitzer der Tiere zu finden. Die Arbeit gilt eigentlich bislang den Hauskatzen. Ein bundesweites "Meldesystem" für verunfallte Wildtiere gibt es nicht, so dass bei vielen Bürger*innen Ratlosigkeit entsteht, was nun m…	breit, alle mit Internetzugang	Alle, die tote Katzen finden und diese melden wollen, kann letztendlich jeder mit Internetzugang und Kamera. Bestimmung ob Wildkatze oder nicht kann selbst erfolgen (dann Wissen erforderlich), würde aber auch von Projektverantwortlichen gemacht	Breit	Alle, die sich dafür interessieren, ob und wo es Wildkatzen gab, Forschungsergebnisse über Vorkommen von Wildkatzen, Daten öffentlich in Totfundmonitoring	Mittel	Kann nur aus Meldung mit Foto und Koordinaten bestehen, aber auch mehr Involvierung möglich (Bestimmung lernen, Schulungen, Online-Seminare)	distributed intelligence	Forschung, (Bildung)	Lernen, Wildkatzen zu bestimmen, über ihren Lebensraum lernen	Beurteilung der Populationsentwicklung der Europäischen Wildkatze, erkennen von Wanderkorridoren, Unfallschwerpunkte erkennen und Schutzmaßnahmen ergreifen	Angewandte Forschung	Katzenliebhaber, die jetzt schon Totfunde melden															X
Fledermausforscher in Berlin gesucht	Berlin-Brandenburg	Verbundprojekt Wtimpact, Leipniz-Institut für Zoo- und Wildtierforschung (IZW)	ab Mai 2019 in festgelegten Erhebungszeiträumen	In festgelegten Erhebungszeitpunkten von je 2 Monaten mit Fledermausdetektor festgelegte Routen abgehen, auf Plattform Austausch mit anderen über Ergebnisse	https://www.buergerschaffenwissen.de/projekt/fledermausforscher-berlin-gesucht	Sie leben mitten unter uns und doch wissen nur die wenigsten Menschen mehr über sie: Fledermäuse. Fledermäuse sind nachtaktive und aktiv fliegende Säugetiere, welche unter anderem aufgrund ihrer Nahrungsweise (in Deutschland: Insektenfresser) wichtig für ein gesundes Ökosystem sind. Von den 25 in Deutschland vorkommenden Fledermausarten wurden bisher in Berlin 18 Arten nachgewiesen. Doch wo komme…	mittel	Bewerbung notwendig, Teilnahme von nur 60 Personen pro Projektphase, nur diese können Daten nutzen und sich im Forum austauschen (?)	eng	Zunächst haben nur Teilnehmende Zugriff auf Ergebnisse, später vstl. mehr Personen bzw. Forschung	mittel	Festgelegte Routen ablaufen mit Fledermausdetektor, Auswertung und Auswahl der Routen von Forschern, Bürger bekommen Ergebnisse und können Grafiken erstellen, im Forum über Projekt austauschen. FB über Forschungserlebnis	crowdsourcing	Forschung	Etwas lernen über Fledermäuse	Doch wo kommen sie in Berlin genau vor? Und wie beeinflussen Faktoren wie nächtliches Licht, Vegetation oder der Versiegelungsgrad (d.h. Bebauung, z.B. mit Häusern und Straßen) das Vorkommen der Fledermäuse in Berlin? Neue Informationen über Vorkommen unterschiedlicher Fledermausarten in Berlin, und über Forschungserlebnisse der Teilnehmenden, Bürgerwissenschaft so verbessern	Angewandte Forschung	Fledermäuse durch Detektor hören															X
Wildtierforscher in Berlin gesucht	Berlin-Brandenburg	Verbundprojekt Wtimpact, Leipniz-Institut für Zoo- und Wildtierforschung (IZW), Leibniz-Instituts für Troposphärenforschung (TROPOS) in Leipzig, des Leibniz-Instituts für die Pädagogik der Naturwissenschaften und der Mathematik (IPN) in Kiel und des Leibniz-Instituts für Wissensmedien (IWM) in Tübingen.	Ab Oktober 2018 in festgelegten 2-monatigen Ergebungszeiträumen	Alleine im jeweiligen Garten und im Online-Forum Austausch mit anderen	https://www.buergerschaffenwissen.de/projekt/wildtierforscher-berlin-gesucht	Ziel des Projektes ist es, zusammen mit Bürgerwissenschaftler*innen mehr über die Verbreitung und das Verhalten wildlebender Säugetiere in Berlin herauszufinden. In den nächsten Jahren (2018-2020) wird es vier Durchgänge (Feldphasen) des Projekts geben, die jeweils zwei Monate dauern. Die Anzahl der Bürgerwissenschaftler*innen ist auf 200 pro Feldphase begrenzt.	eng	nur Berliner mit eigenem Garten, max. pro 200 pro Feldphase, mit vorheriger Bewerbung	eng	Ergebnisse erstmal nur Teilnehmenden zur Verfügung gestellt, später vstl. mehr Personen bzw. Forschung	mittel	Wildtierkamera aufhängen, Auswertung von Forschern durchgeführt, Teilnehmende bekommen Ergebnisse, und können Grafiken erstellen, im Forum über Projekt und Ergebnisse der anderen austauschen, Statistische Tests durchführen. FB ausfüllen über Forschungserlebnis	crowdsourcing	Forschung	Neues Wissen über Wildtiere in Berlin	Neues Wissen über Verbreiten und Verhalten von Wildtieren in Berlin. Verbesserung von Bürgerforschung durch begleitenden FB	Angewandte Forschung	Interesse daran, was alles im Garten rumläuft															X
Forschung. Umweltbildung. Naturschutz - Mit F.U.N. in die Wildnis	Deutschland	Universität Greifswald, Naturpark Nossentinger/Schwinzer Heide	Ab März 2017	Citizen-Science-Station in einem Haus in der Mecklemburgischen Seenplatte	https://www.buergerschaffenwissen.de/projekt/forschung-umweltbildung-naturschutz-mit-fun-die-wildnis	Am Beispiel von Fledermäusen wollen wir Forschung (im Sinne von Citizen Science), Umweltbildung und praktischen Naturschutz in einer einzigartigen Naturlandschaft Deutschlands eng verzahnen. Unser Angebot richtet sich an alle, die sich für Fledermäuse, Wissenschaft und Naturschutz interessieren: unabhängig vom Alter und den Vorkenntnissen. Neben der breiten Bürgerbeteiligung ist ein zweiter Schwe…	eng	mehrere Tutorials und Tests müssen vor der Auswertung der Daten durchlaufen werden, um gute Qualität zu gewährleisten.	breit	Ergebnisse offen auf Webseite zur Verfügung gestellt. In Zeitschriftenartikeln für Forschung publiziert, außerdem populärwissenschaftliche Artikel	stark	Bürgerforscherinnen bilden eigene Forschungsfrage, Hypothesen, werten und Interpretieren Daten. Datenerhebung hauptsächlich automatisiert	extreme citizen science	Forschung, Bildung	Mehr über Fledermäuse erfahren, Umweltbildungsaspekt und Zusammenarbeit mit Bildungseinrichtungen (Kindergärten bis Unis).	Neues Wissen über Fledermäuse, Veröffentlichungen in Zeitschriften, Handlungsrichtlinien für Schutz von Fledermäusen	Angewandte Forschung	Forschung soll spaß machen, fun im Projekttitel				x											X
Medien-Doktor Citizen - Was ist ein guter Umweltjournalismus?	Deutschland, Schwerpunkt zunächst Münster/Dortmund	Institut für Journalistik, TU Dortmund	Ab April 2018	Workshops	https://www.buergerschaffenwissen.de/projekt/medien-doktor-citizen-was-ist-guter-umweltjournalismus	Was erwarten Leser, Hörer oder Zuschauer von der Berichterstattung über Umweltthemen? Welche Aspekte erscheinen ihnen interessant und wichtig? Statt das Publikum nur zu befragen oder Klickzahlen auszuwerten, beziehen wir beim Medien-Doktor CITIZEN Bürgerinnen und Bürger als Experten aktiv in die Qualitätsforschung ein. Die Teilnehmenden formulieren in einem mehrstufigen Diskursprozess Maßstäbe fü…	eng	SchülerInnen sowie Umweltengagierte, bei Interesse kann man sich per E-Mail melden	breit	Auswertungen werden veröffentlicht in Gutachten. Beitrag zur journalistischen Qualitätsforschung	hoch	Teilnehmende formulieren Maßstäbe für gute Qualität im Umweltjournalismus und der Umweltkommunikation und begutachten mit diesem Kriterienkatalog Beiträge in Medien, Pressemitteilungen	participatory science	Forschung, Bildung	Quellen- und Medienkompetenz bei Schülerinnen stärken	Beitrag zur journalistischen Qualitätsforschung, was werden für Kriterien an guten Umweltjournalismus, gute Umweltkommunikation gestellt?	Angewandte Forschung					X
Wildtiere im Siedlungsraum Baden-Württembergs	Baden-Württemberg	Professur für Wildtierökologie und Wildtiermanagement der Albert-Ludwigs-Universität Freiburg	k.a.	Online-Plattform	https://www.buergerschaffenwissen.de/projekt/wildtiere-im-siedlungsraum-baden-wuerttembergs	Wildtiere haben sich an das Leben im Siedlungsraum angepasst und leben mit den Menschen in enger Nachbarschaft. Sei es der Spatz im Café, das Eichhörnchen im Park, der Igel im Garten oder der Schwan auf dem Dorfteich. Sogar Füchsen, Mardern, Rehen und Dachsen kann man in unseren Städten und Dörfern begegnen. Wir Forscher*innen von der Albert- Ludwigs- Universität Freiburg möchten herausfinden, we…	breit	Jeder in Baden-Württemberg	breit	Forschung durch neue Erkenntnisse und alle durch neues Wissen über Wildtiere in Baden-Württemberg (offene Karte mit Sichtungen, Veröffentlichungen in den Medien)	mittel	Melden von Wildtierbeobachtungen (Tiere, Tierbaue, Spuren, Totfunde) und Konflikte mit ihnen, Fotos dazu hochladen, Bestimmung der Tiere durch Steckbriefe	distributed intelligence	Forschung	BürgerInnen für Wildtiere sensibilisieren	herausfinden, welche Wildtiere im Siedlungsraum Baden- Württembergs vorkommen und an welchen Orten es besonders oft zu Begegnungen zwischen Mensch und Wildtier kommt. Unsere Forschung soll dazu beitragen, Konflikten mit Wildtieren vorzubeugen und gleichzeitig die Bürger für ihre wilden Nachbarn sensibilisieren.	Angewandte Forschung	Interesse an Wildtieren, diese zu bestimmen Lernen und wissen, wo sie vorkommen															X
FotoQuest Go	Europa	International Institute of Applied Systems Analysis	Ab Juni 2018 bis 30. September	App FotoQuest	https://www.buergerschaffenwissen.de/projekt/fotoquest-go	Jeden Tag werden in Europa große Mengen an Land in Geschäfts-, Wohn-, Freizeit- und Verkehrsflächen umgewandelt. Dabei müssen fruchtbare Böden, Artenvielfalt und natürliche CO2-Speicher Asphalt und Beton weichen. Außerdem steigt durch die zunehmende Oberflächenversiegelung die Gefahr von Überschwemmungen drastisch. Um die Veränderungen von Landflächen und deren Auswirkungen auf die Umwelt besser …	breit	Alle Personen mit Smartphone	breit	Ergebnisse für alle zugänglich, stehen für weitere wissenschaftliche Projekte und BürgerInnen zur Verfügung	gering	App navigiert Teilnehmende zu einem Ort, an dem Daten fehlen, zeigt anschließend, welche Fotos und Infos benötigt werden	crowdsourcing	Forschung		Daten erheben zur aktuellen Bodennutzung, Landnutzungsveränderungen in Europa verfolgen, wichtig für Forschung zu Landnutzung, Bodenversiegelung, Überschwemmungen, Klimawandel	Angewandte Forschung	Pro bearbeitetem Punkt gibt es etwas Geld, ein Challenge Punkt pro Woche, bei dem es mehr Geld gibt											X		X
Bremer Kogge! Foto-Aufruf zur Maritimen Geschichte	Europa	Deutsches Schifffahrtsmuseum, Leipzig-Institut für Maritime Geschichte	k.a.	Fotos einsenden	https://www.buergerschaffenwissen.de/projekt/bremer-kogge-foto-aufruf-zur-maritimen-geschichte	Der Fund eines mittelalterlichen Schiffswracks 1962 in der Weser in Bremen war eine Sensation und hat den historischen Schiffstyp "Kogge" wieder mehr ins Bewusstsein der Menschen gerückt. Doch auch schon vorher war die Kogge ein beliebtes Motiv, das unweigerlich mit der Handelsmacht der mittelalterlichen deutschen Hanse in Verbindung gebracht wurde. Wo, wie und warum wird die Kogge noch heute auf…	eng	Alle Personen, die irgendwo Gegenstand mit Kogge-Bild oder -Symbol finden	breit	Ergebnisse im Deutschen Schifffahrtsmuseum gesammelt, dienen kulturgeschichtlicher Doktorarbeit und für weitere Forschung	mittel	Fotos von Gegenständen oder Gebäuden, auf denen Koggen (Schiffsart) abgebildet sind sowie Information über Stand-/Fundort und persönliches Statement	crowdsourcing	Forschung		Wissen über Rezeption der Kogge als Motiv, Forschungsfeld Erinnerungskultur	Angewandte Forschung	Fans der Kogge, Sammler
Sturmflut! Foto-Aufruf zur Maritimen Geschichte	Deutschland	Deutsches Schifffahrtsmuseum, Leipzig-Institut für Maritime Geschichte	k.a.	Fotos einsenden von Flutmarken (z.B. Sturmflutpfählen) an deutscher Nord- und Ostseeküste über Formular, E-Mail oder Post	https://www.buergerschaffenwissen.de/projekt/sturmflut-foto-aufruf-zur-maritimen-geschichte	Der Umgang des Menschen mit dem Meer wird maßgeblich von den Erfahrungen beeinflusst, die Küstengesellschaften im Laufe der Jahrhunderte mit dem Meer gemacht haben. Das Meer und seine Eigenschaften zu verstehen, stellt die Grundlage für seine Nutzung (z.B. zur Schifffahrt) dar. Doch trotz seiner Kenntnisse über den Ozean ist es dem Menschen nicht möglich, das Meer vollständig unter Kontrolle zu b…	breit	Alle Personen an Nord- und Ostsee mit Kamera	breit	Ergebnisse für Forschung, einige in Ausstellungen des Deutschen Schifffahrtsmuseium integrieren	gering	Nur Fotos einsenden	crowdsourcing	Forschung		Kulturhistorische Studie, wie an Sturmfluten erinnert wird, wie Mensch mit dem Meer umgeht. Indirekt dadurch Bewusstsein der Bevölkerung gegenüber Naturgewalten stärken	Angewandte Forschung												X			X
Burg Wersau - Die Burg unter der Grasnarbe	Baden-Württemberg	Burg Wersau. Zusammen mit Archäologen der Universität Heidelberg	Seit Februar 2018	Treffen und gemeinsame Arbeit vor Ort.	https://www.buergerschaffenwissen.de/projekt/burg-wersau-die-burg-unter-der-grasnarbe	Seit 2012 arbeiten wir als Arbeitskreis zusammen mit Archäologen der Uni Heidelberg an der Freilegung und Aufarbeitung der Burg Wersau. Dass die Burg Wersau eine besondere Bedeutung hatte, wird spätestens durch die Überreichung der päpstlichen Bulle zur Gründung der Universität Heidelberg 1386 eindeutig. In den nächsten Jahren wollen wir das gesamte Burggelände erfasst haben und auf dem Areal ein…	breit	Alle Interessierten an Ausgrabungen, Analysen, Geländearbeiten, Quellenforschung. Ab 10 Jahren. Kein Equipment oder Vorwissen notwendig. Archäologische Ausgrabung vor Ort, Reinigung und Sortierung von Funden, Geländepflege, Quellenforschung, Betreuung des Kindergrabungsfeldes u.v.m	breit	Ziel ist permanentes Museum mit Veranstaltungen, u.a. auch Online-Museum	stark	Mitarbeit in verschiedenen Bereichen möglich, teilweise Forschung, teilweise auch praktische Arbeit wie Geländepflege	distributed intelligence	Forschung, Freizeit, Bildung	Etwas über Archäologie und die Burg lernen, Lehrgrabungen der Universität	Ausgrabungen, Quellenarbeit	Angewandte Forschung	Kindergrabungsfeld, gemeinsames Arbeiten an Wochenenden				X
OpenLabNet - Make Science!	Sachsen-Anhalt	Frauenhofer IMWS, Martin-Luther-Universität Halle-Wittenberg Gründerservice, science2public - Gesellschaft für Wissenschaftskommunikation e.V.	Seit Februar 2018	teilweise online, teilweise vor Ort, alle halbe Jahre Innovationslabor	https://www.buergerschaffenwissen.de/projekt/openlabnet-make-science	OpenLabNet - Make Science! vereint mehrere Citizen Science Projekte mit unterschiedlichen Themenschwerpunkten. Das Netzwerk möchte die Citizen-Science-Community in Mitteldeutschland stärken und den einfachen Zugang zu Fragestellungen der Wissenschaft ermöglichen. Das Projekt "Vermessung der Welt 2.0" ermittelt gemeinsam die Feinstaubwerte von Halle (Saale) und sorgt für eine saubere Luft in der S…	breit	Teilnehmen kann man bei den verschiedenen dazugehörigen Projekten zu unterschiedlichen Themen oder auch eigene Idee einbringen.	breit	Ergebnisse für alle gedacht, u.a. Feinstaubkarte, neues Wissen für Entwicklung einer VR-Lernsoftware. Insgesamt ist Ziel Verbesserung der Lebensqualität von Menschen allen Alters	mittel	Je nach Teilnahme	distributed intelligence	Forschung, Bildung, Freizeit	Neues über Themen im Alltag lernen	Neue Daten und Wissen (z.B. Feinstaubwerte, Wirkung von Internetblog auf Alltagsverhalten)	Angewandte Forschung	Ideen einbringen, mitmachen und vernetzen			X	x					X		X	X
Artenvielfalt erleben - Was fliegt vor meiner Tür?	Deutschland	Leipzig-Institut für Länderkunde Leipzig, Leipniz-Institut für Wissensmedien Tübingen, Dachverband Deutscher Avifaunisten Münster	Seit Januar 2018	App NaturalList oder analog und später am PC Vogelsichtungen melden	https://www.buergerschaffenwissen.de/projekt/artenvielfalt-erleben-was-fliegt-vor-meiner-tuer	Damit die BürgerwissenschaftlerInnen die gesammelten Daten auch selbst analysieren und auswerten können, entwickelt das Leibniz-Institut für Wissensmedien (IWM) und das Leibniz-Institut für Länderkunde (IfL) gemeinsam mit dem Dachverband Deutscher Avifaunisten (DDA) e.V., gefördert vom BMBF, ein nutzergerechtes Online-Portal. Damit lassen sich die Vogelbeobachtungen künftig besser darstellen und …	breit	Alle, die Vögel sichten und melden wollen	breit	Daten über Vogelsichtungen können von allen angesehen werden, später eigene Auswertungen möglich. Neue Software später offen verfügbar	mittel	Vögelsichtungen mit Kamera oder Skizze festhalten, melden wo, wann und was beobachtet wurde. Zusätzlich in Workshops erarbeiten, welche Anforderungen an Aufbereitung und Nutzung der Daten bestehen, neues Portal testen	distributed intelligence	Forschung, Freizeit		Entwicklung eines neuen digitalen Werkzeuges, Herausfinden, ob neues Portal zu Veränderung bei Bürgerwissenschaftlerinnen führt	Angewandte Forschung	Vögel beobachten und melden															X
Stadtwildtiere Berlin	Berlin-Brandenburg	Leipniz-Institut für Zoo- und Wildtierforschung und Stadtwildtiere	Seit April 2017	Online auf Plattform Tiere melden	https://www.buergerschaffenwissen.de/projekt/stadtwildtiere-berlin	Ziel des Projektes ist es, möglichst viele Meldedaten von Tieren und ihren Spuren zu bekommen. Außerdem können sich Bürger*innen über Stadtwildtiere und über Wildtierforschung in Berlin informieren und Antworten zu häufig gestellten Fragen bekommen. Die Seite bietet Informationen über Tierarten in Berlin und gibt Tipps für ein harmonisches Miteinander.	breit	alle, die Tiere oder deren Spuren sehen und Fotos machen	breit	Forschungsergebnisse über Tiere und ihre Spuren, Informationen für BürgerInnen über Tierarten, Tipps für ein harmonisches Miteinander	gering	Lediglich melden von Tieren oder deren Spuren online auf einer Plattform	crowdsourcing	Forschung Freizeit, Bildung	Neues über Tiere erfahren und über Umgang mit ihnen, Verständnis für Wildtiere erhöhen, Verständnis für wissenschaftliches Arbeiten und die Ergebnisse erhöhen	Wisse, wo welche Tiere vorkommen	Angewandte Forschung	Tiere beobachten				X											X
GeoPortOst: "Versteckte Karten" entdecken und verorten	Europa	Leipniz-Institut für Ost- und Südosteuropaforschung	Seit Juni 2018	Plattform GeoPortalOst	https://www.buergerschaffenwissen.de/projekt/geoportost-versteckte-karten-entdecken-und-verorten	Historiker, Ökonomen und viele andere: Forscher brauchen immer wieder Karten. Helfen soll ihnen das Projekt GeoPortOst, das Karten zum östlichen Europa sammelt und im Internet veröffentlicht. Der Schwerpunkt liegt auf thematischen Karten zur Geschichte, zur Ethnographie sowie zu ökonomischen und sozialen Verhältnissen der Region. Das Problem: Dabei handelt es sich in der Regel um „versteckte Kart…	breit	keine bestimmten Fachkenntnisse notwendig, aber Umgang mit Computer und Karten notwendig	breit	thematische Karten für Forschung, bleiben außerdem auf Plattform sichtbar und damit nutzbar für alle	mittel	Georeferenzieren von Punkten auf thematischen Karten mit modernen Online-Karten	distributed intelligence	Forschung, Freizeit		thematische Karten auf Online-Karte verorten, um die besser nutzen zu können, Untersuchung von rühmlichen Veränderungen	Angewandte Forschung	die fleißigsten Engagierten werden auf Plattform genannt und bekommen Preise
Landinventur: Bring dein Dorf zurück auf die Landkarte	Mecklemburg-Vorpommern	Thünen-Institut für Regionalentwicklung	Seit November 2017	Vor Ort in Orten in Mecklemburg-Vorpommern an mobiler Forschungsstation. Online als DorfbotschafterIn, Online-Fortbildungen	https://www.buergerschaffenwissen.de/projekt/landinventur-bring-dein-dorf-zurueck-auf-die-landkarte	In der Landinventur möchten wir gemeinsam mit Bürgerwissenschaftler*innen ein alltagsnahes Bild des ländlichen Raums am Beispiel von Mecklenburg-Vorpommern zeichnen. Mit unserer mobilen Forschungsstation fahren wir bis zum Herbst 2019 durch die Dörfer Mecklenburg-Vorpommerns, um geeignete Kriterien zu entwickeln, die die Lebenswirklichkeit vor Ort besser beschreiben können, als amtliche Statistik…	breit	Alle in ländlichen Regionen in MV	breit	Ergebnisse werden auf Online-Plattform allen zugänglich dargestellt	gering	Entwicklung von Kriterien, die Lebenswirklichkeit vor Ort beschreiben bei Workshops, Online-Fortbildungen, Landinventur (Beschreibung des eigenen Dorfes)	distributed intelligence	Forschung, Freizeit, (Bildung)	Teilnahme an Online-Fortbildungen	Wie kann Lebensqualität auf Dörfern am Besten beschrieben und erhoben werden?	Angewandte Forschung	Sich für sein Dorf einsetzen, dieses Kartieren											X
Flora Frankfurt online	Hessen	Senckenberg Forschungsinstitut und Naturmuseum Frankfurt ,Stadt Frankfurt am Main Umweltamt, Goethe Universität Frankfurt	Ab Januar 2010	Online auf Plattform wildwachsende Pflanzenarten melden	https://www.buergerschaffenwissen.de/projekt/flora-frankfurt-online	Alle Arten höherer Pflanzenarten, die im Stadtgebiet von Frankfurt am Main seit 1700 nachgewiesen worden sind, sollen der Öffentlichkeit vorgestellt werden. Mit Hilfe der Bürger soll die weitere Entwicklung der Bestände dokumentiert werden.	breit	Alle, die wildwachsende Pflanzenarten finden und diese melden wollen, kann letztendlich jeder mit Internetzugang	breit	Die gesamten Daten sind auf der Webseite als neue Punkte in den Verbreitungskarten sichtbar. Die Funddaten werden verwendet, Die Funddaten werden verwendet, um den Florenwandel zu untersuchen	Mittel	Lediglich wildwachsende Pflanzenarten online auf einer Plattform melden	crowdsourcing	Forschung ,Freizeit, Bildung	verschiedene wildwachsende Pflanzenarten kennenlernen	Wissen über Florenwandel, um diesen Wandel frühzeitig erkennen und ggf. etwas dagegen unternehmen zu können.	Angewandte Forschung	Neue Pflanzenarten entdecken				x											x
Insektensommer	Deutschland	NABU (Naturschutzbund Deutschland)	Ab Juni 2018	App „Insektenwelt“	https://www.buergerschaffenwissen.de/projekt/insektensommer	Der NABU engagiert sich seit Jahren für den Schutz der Insekten, denn die kleinen Krabbeltiere sind unverzichtbar für unser Ökosystem. Sie tragen zur Vermehrung von Pflanzen sowie zur Fruchtbarkeit des Bodens bei. Studien zeigen, dass die Insekten in Deutschland deutlich zurückgehen. Intensive Landwirtschaft, der Einsatz von Pestiziden und die Ausräumung der Landschaft sind nur einige Gründe für …	breit	Alle Bürger*innen können an der Aktion teilnehmen	breit	Die Zahlen und Ergebnisse werden auf der Website veröffentlicht. Diese können wiederum eine wichtige und hilfreiche Grundlage für Aktivitäten im Insektenschutz sein.	gering	Erkannte Insekte in einem bestimmten Zeitraum melden .	distributed intelligence	Forschung		Eine Grundlage für Aktivitäten im Insektenschutz schaffen	Grundlagenforschung																x
TreeChecker - welche Straßenbäume für die Stadt der Zukunft?	Deutschland	Schulbiologiezentrum Hannover	Ab Mai 2018	Daten vor Ort mit Hilfe einer Web-App oder mit Papier und Stift erfassen und später mit dem Handy erheben oder am PC hochladen	https://www.buergerschaffenwissen.de/projekt/treechecker-welche-strassenbaeume-fuer-die-stadt-der-zukunft	Welche Baumart ist besonders für die Stadt geeignet? Sind Bäume in der Stadt häufiger krank als auf dem Land? Bürger können mithelfen solche und ähnliche Fragen zu beantworten, indem sie herauszufinden, welche Bäume in ihrer Wohnumgebung wachsen und wie gesund diese sind. So können Bäume gefunden werden, die das Stadtklima und den Klimawandel gesund überstehen. Hierfür sollen möglichst viele Bäum…	breit	Alle, die die Bäume im Umfeld untersuchen wollen	breit	Die eingetragenen Bäume und deren Gesundheitszustand sind auf einer Karte sichtbar.. Die entstehende Datenbank ist für jedermann frei zugänglich und steht für eigene Forschungen, für Schulen (z.B. für Facharbeiten oder Jugend forscht) und Universitäten zur Verfügung.	mittel	Erfassung von Daten über die Bäume im Wohnumfeld	distributed intelligence	Forschung		Die Ergebnisse können genutzt werden, die Belastung der Straßenbäume im Zuge des Klimawandels zu erforschen, vielleicht besonders resistente Bäume zu entdecken, um für Städte besonders geeignete Bäume zu finden	Angewandte Forschung														x		x
Du kannst forschen	Rheinland-Pfalz	Römisch-Germanisches Zentralmuseum, Die Forschungsmuseen der Leibniz Gemeinschaft, Vulkanpark	Ab Mai 2018	vor Ort Experimente praktisch durchführen und sorgfältig dokumentieren	https://www.buergerschaffenwissen.de/projekt/du-kannst-forschen	Das Citizen Science-Projekt unter dem Titel „Du kannst forschen“ soll den Bürgerinnen und Bürgern die Forschung des Römisch-Germanischen Zentralmuseums näher bringen. Ein erfolgversprechender Anwendungsbereich sind Langzeitversuche zur Leistungsfähigkeit antiker Maschinen. Besonders praktikabel hierzu sind Handdrehmühlen.	breit	Alle ,die Interesse an Archäologie haben	breit	Die Ergebnisse sollen einerseits als wissenschaftlich begutachteter Artikel publiziert, aber auch im Laufe des gesamten Zeitraumes videodokumentiert werden	mittel	Teilnehmende können unter wissenschaftliche Begleitung Experimente durchführen	participatory science	Forschung, Freizeit , Bildung	Wissen über das Römisch-Germanischen Zentralmuseum	Darstellung eines Films über Römisch-Germanischen Zentralmuseums, Einrichtung eines Wissenschaftsblogs	Angewandte Forschung	Forschung und Durchführung von Experimente soll spaß machen				x
Forschungsfall Nachtigall	Berlin-Brandenburg	Museum für Naturkunde Berlin	Ab Januar 2018	App „Naturblick“	https://www.buergerschaffenwissen.de/projekt/forschungsfall-nachtigall	Im Frühjahr präsentiert sich Berlin als Hauptstadt der Nachtigallen (Luscinia megarhynchos). Tausende dieser sangeskräftigen Vögel lassen sich in Gärten, Parks, Gleisanlagen und sogar an belebten Straßenkreuzungen vom Grunewald bis nach Pankow nieder. Ihr melodischer und vielseitiger Gesang, den die Männchen des Nachts erklingen lassen, um Weibchen zu betören und mit dem sie tagsüber ihr Revier v…	breit	Alle Bürgerinnen und Bürger – insbesondere naturbegeistere Nachtschwärmer-,die mit Hilfe einer App der Nachtigall-Gesang aufnehmen wollen	breit	Ergebnisse werden auf der Karte der Projektseite für alle veröffentlicht	mittel	Teilnehmende tragen akustische Aufnahmen des Nachtigall-Gesangs zusammen. Analyse von zusammengetragenen Daten .	distributed intelligence	Forschung,		Die Forschung trägt dazu bei, die Verbreitungsmuster, Einflüsse wie Licht- und Lärmverschmutzung auf den Gesang sowie die regionalen Dialekte der Nachtigallen im deutschsprachigem Raum besser zu verstehen	Angewandte Forschung																x
Mitmach-Projekt zur Verortung historischer Karten und Luftbilder	Baden-Württemberg	Landesarchiv Baden-Württemberg	Ab März 2018	Online-Plattform	https://www.buergerschaffenwissen.de/projekt/mitmach-projekt-zur-verortung-historischer-karten-und-luftbilder	Sind Sie an Geschichte und Karten interessiert? Kennen Sie Ihren Heimatort oder gar weitere Regionen und Landstriche des Südwestens wie Ihre Westentasche oder möchten diese gerne genauer kennenlernen? Oder sind Sie ein Rechercheprofi und lösen gerne knifflige Rätsel? Vielleicht möchten Sie sich auch einfach als Bürgerforscherin und Bürgerforscher engagieren, um Archiv- bzw. Kulturgut besser zugän…	breit	alle mit Interessa en alten Karten und mit Computer und Internetverbindung	breit	Georeferenzierte Karten für alle zugänglich	mittel	Georeferenzierung von alten Karten auf moderner Karte nach vorgegebener Vorgehensweise	distributed intelligence	Forschung, Freizeit		Aufarbeitung alter Karten für weitere Nutzung, für Vergleich von alten mit modernen Karten, für besseres Archiv der alten Karten und Luftaufnahmen -> Grundlage für spätere Nutzung	eher grundlagenorientierte Forschung	Interesse an Karten, an eigener Umgebund, an kniffeligen Rätseln
Naturblick - Stadtnatur entdecken	Berlin-Brandenburg	Museum für Naturkunde Berlin	Ab März 2015	App "Naturblick"	https://www.buergerschaffenwissen.de/projekt/naturblick-stadtnatur-entdecken	Weitläufige Parks, artenreiche Hinterhöfe oder der Klang von Vogelstimmen begegnen uns in Berlin täglich. Dennoch nehmen wir diese Orte in der Stadt oft nicht als natürliche Lebensräume wahr. Auch wissen wir häufig nur wenig über die Artenvielfalt in unserer direkten Nachbarschaft. Indem wir die Berliner Stadtnatur entdecken und erfassen, stärken wir nicht nur unsere eigene Aufmerksamkeit für Nat…	breit	Alle , die Tiere beobachten wollen	breit	Ergebnisse werden auf Online-Plattform allen zugänglich dargestellt	mittel	Mitarbeit in verschiedenen Bereichen möglich, teilweise Datenaufnahme, teilweise auch Forschung	participatory science	Forschung		Einen Überblick über die Natur gewinnen	Angewandte Forschung																x
„Reden Sie mit!“ bei Unfallverletzungen	Weltweit	Ludwig Boltzmann Gesellschaft	Ab Mai 2018	Online-Plattform	https://www.buergerschaffenwissen.de/projekt/reden-sie-mit-bei-unfallverletzungen	Medizinscher Fortschritt braucht innovative Ideen: Ihr Wissen ist wertvoll! Fast jeder erleidet im Laufe seines Lebens einmal die ein oder andere Freizeitverletzung beim Sport, während der Arbeit oder bei einem Verkehrsunfall. Bei „Reden Sie mit!“ geht es darum, dass wir nach Forschungsfragen zu Unfallverletzungen suchen. Unser Ziel ist, Ihre Fragen in die Forschung zu bringen. Wir wollen Bürgeri…	breit	Alle ,die Zugang zum Internet haben können mitmachen	breit	Ergebnisse werden über Internet visualisiert .Damit können Forscherinnen und Forscher aus dem Bereich Unfallverletzungen aus der ganzen Welt darauf zugreifen und diese Forschungsfragen in ihre Forschung einarbeiten	gering	Teilnehmende beantworten online Fragen	distributed intelligence	Forschung		Die Verbesserung der Diagnose, Behandlung und Rehabilitation	Angewandte Forschung				x
Interlinking Pictura	Weltweit	Deutsches Institut für Internationale Pädagogische Forschung, Bibliothek für Bildungsgeschichtliche Forschung	Ab Mai 2018	?	https://www.buergerschaffenwissen.de/projekt/interlinking-pictura	1790 begann Friedrich Justin Bertuch mit der Publikation seines Bilderbuchs für Kinder. Sein Anspruch war Kinder mit qualitativ hochwertigen Kupfertafeln möglichst kurzweilig Themen aus allen Wissensgebieten nahezubringen. Jeweils 5 Tafeln, begleitet von einem kurzen, kindgerechten Text, wurden als Heft veröffentlicht. Die behandelten Bereiche waren vielfältig: Tiere, Pflanzen, aber auch Bauwerke…	eng	Alle , die Interesse an Bertuchs vielfältigen Themengebiete haben	breit	Die Ergebnisse sind für alle im Internet aufrufbar	mittel	die Daten mit Links zu WikiData versehen?	distributed intelligence	Bildung	neue Erkenntnisse zu Wissen und Bildung um 1800 gewinnen zu können.		Angewandte Forschung					x
Transformationsstadt: BürgerInnen forschen für ein Gutes Leben	Nordrhein-Westfalen	Zentrum für Transformationsforschung und Nachhaltigkeit (Verbundkoordination)	Ab September 2017	vor Ort in Workshops, später Online	https://www.buergerschaffenwissen.de/projekt/transformationsstadt-buergerinnen-forschen-fuer-ein-gutes-leben	Im Projekt „Transformationsstadt — BürgerInnen forschen für ein Gutes Leben“ wird in einem Zusammenschluss aus Zivilgesellschaft und Wissenschaft gemeinsam mit Bürgerinnen und Bürgern das GeoPortal des Guten Lebens entwickelt. Das Projekt verfolgt dabei die Idee, das Potential zivilgesellschaftlicher Selbstorganisation zu nutzen, um Wissen zu generieren und aufzuarbeiten, den BürgerInnen durch ei…	breit	Alle interessierten im Bergischen-Land ,später überall	breit	Ergebnisse für alle auf einer Karte sichtbar	mittel bis stark	mittel bei den , die Daten eintragen oder an Workshops teilnehmen . Stark bei denen , die längerfristig beteiligt sind (Praxis-partner)	participatory science	Freizeit,Bildung,Forschung	Bürger erfahren etwas über ihre Stadt	Am ende des Projekts sammeln und darstellen von Daten	Angewandte Forschung	Orte in der Umgebung kennenlernen				x					x		x
Hear How You Like To Hear	Deutschland	Gefördert vom Bundesministerium für Bildung und Forschung	Ab April 2018	Treffen und gemeinsame Arbeit vor Ort.	https://www.buergerschaffenwissen.de/projekt/hear-how-you-hear	BürgerInnen forschen gemeinsam mit WissenschaftlerInnen an tragbaren Hörhilfen, sogenannten „Hearables“, die sowohl im Klang als auch im Aussehen frei gestaltet werden können. Unter Hearables versteht man intelligente Geräte, die am Körper getragen werden und in erster Linie zum Hören dienen. Beispiele sind etwa Bluetooth Headsets, InEar-Monitore für Musiker oder aber auch Hörgeräte. Aktuelle Ent…	breit	Alle Interessierte mit und ohne Höreinschränkung.	breit	Veröffentlichung von Daten auf einer Webseite , aber auch auf sozialen Netzwerke .und damit sind die Ergebnisse für alle zugänglich	Mittel bis Stark	Bürgerforscherinnen testen Hörgerät, Betroffene und Expertinnen kreieren neue Ideen für Design und Anwendungen der Hörgerät	participatory science	Forschung	Technik selbst zu gestalten	Verbesserung der Hörgerät	Angewandte Forschung										x
Bee Observer BOB	Deutschland	Universität Bremen,Hiveeyes, Hiverize	Ab Januar 2018	gemeinsame Arbeit vor Ort	https://www.buergerschaffenwissen.de/projekt/bee-observer-bob	Bienen sterben weltweit in bisher nie dagewesenem Ausmaß. Dabei sind die Insekten für den Erhalt des Ökosystems von zentraler Bedeutung. Wenn Honigbienen keine Nutzpflanzen mehr bestäuben, wäre auch unsere Nahrungsmittelproduktion betroffen. Wir wollen Bienenstöcke mit Sensoren ausstatten, Daten aufzeichnen und auswerten. Bürger*innen und Wissenschaftler*innen arbeiten Hand in Hand und schaffen g…	eng	nur Imker*innen, Maker*innen,	breit	Veröffentlichung von Daten auf einer App .	mittel	Bürger*innen betreuen die Bienen und die Technik, dokumentieren die imkerlichen Tätigkeiten und Ereignisse und bringen sich in den wissenschaftlichen Auswertungsprozess ein.	participatory science	Forschung , Bildung	Bürger*innen lernen in Workshops, wie die Sensoren in Bienenstöcke eingebaut und Daten gesammelt werden können	Ermöglichung ''minimalinvasiver“ imkerlicher Betriebsweise	Angewandte Forschung					x					x				x		x
HackAIR: Bürger*innen messen Feinstaub	Deutschland	Bund für Umwelt und Naturschutz Deutschland e.V.	Ab Februar 2018	App	https://www.buergerschaffenwissen.de/projekt/hackair-buergerinnen-messen-feinstaub	Schlechte Luftqualität hat auf Mensch und Umwelt enorme Auswirkungen. In Deutschland geht die Europäische Umweltagentur von jährlich 66.000 vorzeitigen Todesfällen allein aufgrund der Feinstaubbelastung aus. Bei hackAIR können Bürger*innen mit einer Smartphone App Feinstaub selber messen. Die Daten werden in einer offenen Datenbank allen zugänglich gemacht. Ziel ist es, mehr Feinstaudaten zu gene…	breit	Alle Personen mit Smartphone	breit	Die Daten sind für alle Interessierten offen zugänglich.	gering	Nur Fotos von Himmel machen	crowdsourcing	Forschung		Verbesserung der Luft , Weiterentwicklung von Feinstaub-Messen Apps	Angewandte Forschung				x						x		x				x
Die Wanderung des Admiralfalters	Europa	Forschungsgruppe Insektenmigration und -ökologie, Abteilung Community Ecology, Institut für Ökologie & Evolution, Universität Be	Ab September 2017	Online-Plattform, App NaturaList	https://www.buergerschaffenwissen.de/projekt/die-wanderung-des-admiralfalters	Den Zugvögeln ähnlich wandern Millionen Admirale jeden Herbst in südliche Gefilde. Es handelt sich dabei um die Nachkommen jener Falter, die im Sommer den Norden Europas von Süden her besiedelt haben. Obwohl der Admiral häufig ist, gibt es zu seinem Wanderverhalten noch viele offene Fragen, etwa zum Einfluss von Wind und Wetter, zu den zurückgelegten Distanzen oder zu den Auswirkungen des Klimawa…	breit	Alle Personen mit Smartphone, eine Anmeldung bim Portals ist nötig	breit	Die Ergebnisse werden in wissenschaftlichen wie auch populärwissenschaftlichen Zeitschriften publiziert und öffentlich zugänglich gemacht.	gering	Nur Beobachtung und online Meldung von "Admiralfalter"	crowdsourcing	Forschung		Wissen über Insektenzug , Herausfinden wie Insekten generell auf Veränderungen in ihrer Umwelt reagieren – etwa im Zusammenhang mit der Klimaerwärmung	Angewandte Forschung														x
Sample das Saarland	Saarland	Helmholtz-Institut für Pharmazeutische Forschung Saarland (HIPS)	Ab Juni 2017	Die Probennahme wird mittels eines „Sample-Kit" durchgeführt und in einer mobilen Web-App werden die Proben direkt vor Ort registriert.	https://www.buergerschaffenwissen.de/projekt/sample-das-saarland	Bodenbakterien sind eine wichtige Quelle für Naturstoffe, die sich weiterentwickeln lassen zu neuartigen Medikamenten. Die Wissenschaftler am Helmholtz-Institut für Pharmazeutische Forschung Saarland, kurz HIPS, möchten mehr herausfinden über die Bakterien, die das Saarland besiedeln und die – weitgehend unerforscht – wie ein „mikrobieller Schatz" im Boden auf ihre Entdeckung warten. Dafür ist es…	breit	Alle Bürger*innen können an der Aktion teilnehmen	breit	Entwicklung neuer Medikamente , Projekt liefert Grundlagen-Forschung dafür	gering	sammeln von Bodenproben	crowdsourcing	Forschung ,Freizeit		ein wichtiger Beitrag zur wissenschaftlichen Grundlagenforschung Neue Naturstoffe aus Bodenbakterien finden und untersuchen, wie diese wirken.	Grundlagenforschung	das gute Gefühl, einen wichtigen Beitrag zur wissenschaftlichen Grundlagenforschung geleistet zu haben			x												x
Clusterkopfschmerzen erforschen (CLUE)	Deutschland	Institut für Informationssysteme der Hochschule Hof, Hochschule Hof	Ab November 2017	Online-Plattform , App "Clura" und "Mira"	https://www.buergerschaffenwissen.de/projekt/clusterkopfschmerzen-erforschen	Jeder fünfte Erwachsene in Deutschland leidet zumindest zeitweilig unter Clusterkopfschmerzen oder Migräne. In diesem Projekt erforschen die Betroffenen ihre Krankheit selbst und tragen so dazu bei, die Auslöser anfallartiger Kopfschmerzen und die Wirksamkeit neuer Behandlungsmethoden zu untersuchen. Weiterhin werden die alltäglichen psychosozialen Aspekte untersucht, die bei Betroffenen und dere…	eng	Nur Bürger*innen, die unter Clusterkopfschmerzen oder Migräne leiden.	breit	Veröffentlichung und Vorstellung der gewonnenen Forschungsergebnisse auf Fachkonferenzen, Bürgerkongress und in Fachmagazinen	mittel	Beobachtung der Erkrankung , Aufstellung eigenen Hypothesen über die Auslöser ihrer Schmerzen, über Behandlungsmethoden und über deren Wirksamkeit.	distributed intelligence	Forschung , Bildung	Schülerinnen, Schüler und Studierende bekommen die Gelegenheit, innerhalb einer Online-Schulung Grundlagen zur Datenauswertung zu erlernen.	Das Projekt trägt dazu bei, neue Erkenntnisse über Clusterkopfschmerzen, Migräne und ihre auslösenden Faktoren zu erlangen	Angewandte Forschung					x	x
Repara/kul/tur	Deutschland	Zentrum Technik und Gesellschaft der TU Berlin	Ab September 2017	Arbeit vor Ort	https://www.buergerschaffenwissen.de/projekt/reparakultur	Repair-Cafés, offene Werkstätten und Maker-Spaces haben das Potential, ein verändertes Bewusstsein für die Qualität von Produkten, die Kompetenz und Autonomie von Konsument/innen im Produktionsprozess zu fördern. Sie können zudem als Orte der Wissensproduktion betrachtet werden. Ob diese Veränderungen mit der Aneignung von Praktiken des Reparierens und Selbermachens tatsächlich eintreten und wie …	eng	Nutzer/innen und ehrenamtliche Organisator/innen von ausgewählten Repair-Cafés und offenen Werkstätten.	breit	Strategien ,wie reparieren und Selbermachen gestärkt werden kann. indirekte Beitrag zur Nachhaltigkeit	hoch	gemeinsame Auswertung der Ergebnissen ,gemeinsame Entwicklung eines Konzepts für eine Wanderausstellung zum Thema Reparieren und Selbermachen.	participatory science	Forschung , Freizeit		Bürgerwissenschaftlichen Methode weiterentwickelten, Beitrag zur Konsum-Forschung	Angewandte Forschung	gemeinsames Reparieren, diese Art von ehrenamtlicher Arbeit Sichtbarmachen												x
Hush City	Weltweit	TU Berlin	Ab September 2017	App "HUSH CITY"	https://www.buergerschaffenwissen.de/projekt/hush-city	Der Lärmpegel in unseren Städten hat sich in den letzten Jahren zunehmend erhöht. Allein in Europa leiden jedes Jahr ca. 125 Millionen Menschen unter Lärmbelästigung, die durch Verkehr und Umweltverschmutzung verursacht wird. Ruhe wird zu einem Luxusgut, das sich nur noch wenige leisten können. Mithilfe der kostenlosen App HUSH CITY können Bürgerinnen und Bürger ruhige Orte in ihrer Nachbarschaft…	breit	Alle Personen mit Smartphone	breit	die Veröffentlichung von den gesammelten Daten und sind für alle zugänglich .	gering	Nur Aufnahme von Geräusche mit dem Handy in der Umgebung , Fotos machen und hochladen	crowdsourcing	Forschung, Freizeit		Ermöglichung von Zugang zu Ruhe und Erholung , Sensibilisierung für den Schutz und Anrecht auf Ruhe	Angewandte Forschung	Ruhige Orte für Erholung finden			x
Transcribathon Europeana 1914-1918	Europa	Facts & Files / Europeana	Ab November 2016	Online-Plattform	https://www.buergerschaffenwissen.de/projekt/transcribathon-europeana-1914-1918	Europeana 1914-1918 hat über 200.000 private Dokumente aus der Zeit des Ersten Weltkriegs aus ganz Europa gesammelt und digitalisiert. Um entdecken zu können, was vor 100 Jahren geschrieben wurde und auf Europeana 1914-1918 zu finden ist, geht Transcribathon.eu einen Schritt weiter. Auf der Webseite können Sie historische Quellen transkribieren und mit Ortsangaben und Schlagwörtern verknüpfen. Du…	breit	Alle können mitmachen	breit	Alle Ergebnisse sind sofort und für jedermann sichtbar und nutzbar	mittel	Bearbeitung historischer Dokumente (Verknüpfung der Schlagwörtern und Ortsangaben)	distributed intelligence	Forschung , Bildung , Freizeit	Wissen über die europäische Geschichte	Die Archivierung des ersten Weltkriegs aus der Sicht der Menschen aus ganz Europa	Angewandte Forschung	interessante Dokumentationen aus dem ersten Weltkrieg bearbeiten				x
Historisches Radfahrerwissen für Kinder geeignet sofort losforschen	Europa	Bürger & Radfahrer*innen	Ab Januar 2017	Online-Plattform	https://www.buergerschaffenwissen.de/projekt/historisches-radfahrerwissen	Ziel ist es, das Wissen der Radfahrer und Radfahrerinnen vor 1940 wieder öffentlich zugänglich zu machen: z.B. Tourenbücher, Radfahrerzeitungen und -karten. Dieses alte Radfahrerwissen ist meist heute noch nützlich. Wieviel regionales Radfahrerwissen machen wir 2018 wieder sichtbar? In welchen Orten, Bibliotheken, Archiven und privaten Sammlungen gibt es Geschichten, Bücher und andere historische…	breit	Alle Personen ,die Interesse an Radfahrerwissen haben	breit	Die Forschungsergebnisse und digitalisierten Bücher, Artikel und Karten können von anderen genutzt werden	mittel	Verlinkung und Veröffentlichung der Geschichte des Radfahrens,Verfassenung oder Verbesserung Wikipedia Artikels über „die alten Radfahrer“	crowdsourcing	Forschung , Freizeit		die Alltags- und Mobilitätsgeschichte des Radfahrers wieder sichtbar und zugänglich zu machen	Angewandte Forschung	Recherche über das historische Radfahrerwissen
Die Herbonauten	Europa	Botanischer Garten und Botanisches Museum Berlin, Freie Universität Berlin	Ab Juli 2017	Mitarbeit vor Ort	https://www.buergerschaffenwissen.de/projekt/die-herbonauten	Im Herbarium des Botanischen Museums in Berlin existieren über 3,6 Millionen Herbarbelege von getrockneten Pflanzen. Dies macht die Sammlung zum größten Herbar in Deutschland. Leider existiert noch kein digitales Archiv in dem einfach nach Belegen gesucht werden kann. Diese Mammutaufgabe wollen wir gemeinsam mit den Teilnehmern angehen.	breit	Alle , die sich für Herbarium interessieren ,für schwierigere Einträge muss ein Quizze bestanden werden	breit	Alle Wissenschaftler ,die Infos. Aus Herbarium brauchen	gering bis mittel	gering bei einfachen Einprägen , mittel bei schwierigeren Einträge	distributed intelligence	Forschung		Entwicklung der Biodiversität erforschen und ökologische Invasionen durch Pflanzen nachverfolgen	Angewandte Forschung																x
Küstenselfies aus aller Welt gesucht!	Weltweit	Christian-Albrechts-Universität zu Kiel, Coastal Risks and Sea-level Rise Research Group,Exzellenzcluster "Ozean der Zukunft"	Ab März 2017	Online-Plattform	https://www.buergerschaffenwissen.de/projekt/kuestenselfies-aus-aller-welt-gesucht	An der Schnittstelle zwischen Land und Meer sind die Küsten in vielerlei Hinsicht für den Menschen bedeutungsvoll - als Lebensraum, zur Beschaffung von Nahrung, für den Transport von Gütern, als Industriestandorte und Erholungsgebiete. Dementsprechend schwere Folgen hat der Meeresspiegelanstieg für den Menschen. Neben Sturmfluten und Überschwemmungen leiden die Küstenregionen an Erosion, dem…	breit	Alle Personen mit Smartphone	breit	Visualisierung von den Ergebnissen auf einer interaktiven Weltkarte	gering	Lediglich Fotos von Küsten machen und dies Hochladen	crowdsourcing	Forschung		Erweiterung einer globalen Datenbank von Küstentypen, die eine wesentliche Grundlage für die Einschätzung der Gefährdung von Küsten durch den Meeresspiegelanstieg darstellt	Angewandte Forschung														x
Auf den Spuren der Mark Brandenburg	Berlin-Brandenburg	Brandenburgische Genealogische Gesellschaft „Roter Adler“ e.V.	k.a.	Je nach Projekt, Mitarbeit vor Ort , Online-Plattform	https://www.buergerschaffenwissen.de/projekt/auf-den-spuren-der-mark-brandenburg	Als Brandenburgische Genealogische Gesellschaft (BGG) „Roter Adler“ e.V. interessieren wir uns für alle genealogischen und geschichtlichen Daten, die Aufschluss über Familiengeschichte(n) in Brandenburg geben können und bei der Familienforschung unterstützen. Diese Daten sammeln wir auf unserer Webseite und stellen sie allen Familienforschern zur Verfügung. Gleichzeitig freuen wir uns über alle M…	breit	Alle Personen , die Interesse an Brandenburg-Geschichte haben	breit	Veröffentlichung von Daten in einem Buch und auch auf einer Web-Seite	gering	Fotos machen und Hochladen , Daten erfassen	crowdsourcing	Forschung		Datenbanken sind wichtige Grundlagen für die Familienforschung. Sie dienen Historikern, Familienforschern und Chronisten für deren weitere Recherchearbeiten.	Angewandte Forschung
Meldeplattformen	Baden-Württemberg	LUBW Landesanstalt für Umwelt Baden-Württemberg	Ab Januar 2013	melden von Tieren ,Pflanzen per Email, Anruf oder Online,App „Meine Umwelt"	https://www.buergerschaffenwissen.de/projekt/meldeplattformen	Gesucht: Hirschkäfer, Feuersalamander, Laubfrosch, Weinbergschnecke und Gottesanbeterin! Haben Sie eine dieser Arten beim Spazierengehen oder im Garten gesichtet? Dann melden Sie uns Ihren Fund. Über unsere Meldeplattformen möchten wir herausfinden, wo diese ausgewählten Arten in Baden-Württemberg vorkommen. Alle fünf Arten sind besonders oder streng geschützt: Laubfrosch, Hirschkäfer, Feuersalam…	breit	Alle Personen , die Tiere bzw. Pflanze melden wollen	bereit	Ergebnisse auf einer Web-Seite für alle sichtbar	gering	Lediglich Tiere, Pflanze über E-Mail, Anruf oder auf einer App melden	crowdsourcing	Forschung		Entwicklung Schutzkonzepte für diese ausgewählte gefährdete Arten	Angewandte Forschung																x
PlanktonID	Weltweit	GEOMAR Helmholtz-Zentrum für Ozeanforschung, Future Ocean, Kiel Marine Sciences,SFB 754 - Climate-Biogeochemistry Interactions in the Tropical Ocean	Ab Januar 2017	Online-Plattform	https://www.buergerschaffenwissen.de/projekt/planktonid	Plankton ist extrem vielfältig und erfüllt im Ozean viele verschiedene und äußerst wichtige Funktionen. Es besteht aus sehr kleinen bis meter-großen Organismen, die alle nicht gegen Strömungen anschwimmen können. Pflanzliches (Phyto-) Plankton setzt Sonnenstrahlung und Kohlendioxid in Biomasse um. Tierisches (Zoo-) Plankton ernährt sich vom Phytoplankton und stellt die Nahrung für Fische und Wale…	breit	Alle können mitmachen, eine Online Anmeldung notwendig	breit	Darstellung der Ergebnissen auf einer Web-Seite	gering	Bilder in einem Bilder-Spiel zuordnen	distributed intelligence	Forschung , (Bildung)	Wissen über Rhizaria, einzellige Zooplankter	weitere Erforschung von globalen Verteilung und Funktion von Zooplanktongruppen,Leistung .wichtiger Beiträge zur Klima- und Ökosystemforschung .	Angewandte Forschung														x	x
Landshuter Lachmöwen	Bayern	Der Vogelphilipp	Ab Dezember 2016	Online-Plattform	https://www.buergerschaffenwissen.de/projekt/landshuter-lachmoewen	Jährlich überwintern bis zu 1000 Lachmöwen in Landshut und Umgebung. Während sie nachts im Schwarm auf dem Altheimer Stausee übernachten, verteilen sie sich tagsüber und gehen vorallem in die umliegenden Städte, vor allem nach Landshut. Hier sitzen tagsüber bis zu 400 Möwen auf den Brücken und Geländern in der Innenstadt entlang der Isar. Die Lachmöwe ist die häufigste Möwe Europas. Sie brütet in…	breit	jede kann mitmachen	breit	die Daten werden publiziert und gehen später auch in Bücher z.B. über die bayerische Vogelwelt ein.	gering	Fotos machen und Hochladen	crowdsourcing	Forschung , Bildung	Kontakt mit der spannenden Vogelzugforschung	Auswertung des Zuggeschehen der Landshuter Lachmöwen	Angewandte Forschung					x											x
Feldhasen in Berlin Lichtenberg	Berlin-Brandenburg	Leibniz-Institut für Zoo- und Wildtierforschung (IZW), Bridging in Biodiversity Science (BIBS), Berlin-Brandenburgisches Institut für Biodiversitätsforschung (BBIB)	Ab August 2015	Online-Plattform,App anymals & plants, melden per Post möglich	https://www.buergerschaffenwissen.de/projekt/feldhasen-berlin-lichtenberg	In diesem Projekt, das in Kooperation mit dem Bezirksamt Lichtenberg durchgeführt wird, geht es darum, die Verbreitung von Feldhasen in Berlin zu erfassen und ihre Anpassungen an den städtischen Lebensraum zu untersuchen. Darüber hinaus soll auf der Grundlage von genetischen Untersuchungen ermittelt werden, welcher Austausch zwischen den Feldhasen in der Stadt und denen in Brandenburg besteht. Im…	breit	jede kann mitmachen	breit	die Ergebnisse werden in Vorträgen und populärwissenschaftlichen Artikeln zugänglich gemacht	gering	lediglich melden von Feldhasen	crowdsourcing	Forschung		Die Ansprüche der Feldhasen besser verstehen,	Angewandte Forschung																x
BeachExplorer	Europa	Schutzstation Wattenmeer e.V. ,BMUB/BfN	Ab Dezember 2012	Online-Plattform	https://www.buergerschaffenwissen.de/projekt/beachexplorer	Strandbesucher der Nordsee werden mit der kostenlosen App BeachExplorer (oder online über das Webportal www.beachexplorer.org) in die Lage versetzt, über 2000 verschiedene Arten von Strandfunden bildbasiert zu bestimmen. Sie können ihre Funde dann in eine Datenbank melden, um so zur Erforschung der Meeresnatur, des Klimawandels und der Ausbreitung eingeschleppter Arten beizutragen.	breit	Alle Strandbesucher zwischen Den Helder (NL), Stavanger (N) und Malmö (S) sowie in der gesamten Deutschen Bucht können mitmachen	eng und breit	Die Ergebnisse werden für Forschungsarbeiten an der Uni-Oldenburg verwendet, Bei Besonderheiten erden Artikel für die Presse und die sozialen Netzwerke geschrieben.	gering	nur naturkundliche Beobachtungen in eine Datenbank melden	crowdsourcing	Forschung		Anhand biologischer Strandfunde können klimabedingte Zuwanderungen von Meeresorganismen, die frühere Verbreitung heute ausgestorbener Arten oder auch das Auftreten eingeschleppter Arten schlaglichtartig festgestellt werden	Angewandte Forschung															x
Schweinswale - bitte melden!	Niedersachsen und Bremen	Institut für Terrestrische und Aquatische Wildtierforschung / Schweinswale e.V.	Ab Februar 2017	Online-Plattform , Meldungen telefonisch oder über WhatsApp möglich	https://www.buergerschaffenwissen.de/projekt/schweinswale-bitte-melden	Das neuerliches Vorkommen des Schweinswals (Phocoena phocoena) in den großen Flüssen an der Nordseeküste soll genau untersucht werden: Nach hundert Jahren Abwesenheit schwimmen Schweinswale heute wieder regelmäßig im Frühjahr weit in die Unterläufe von Weser und Elbe. Sie folgen Fischschwärmen zu ihren Laichplätzen im Süßwasser und werden in der Elbe sogar über Wochen hinweg im Hamburger Hafen ge…	breit	Alle folgende Personen: Spaziergänger entlang der Elbe oder Weser, Passagier der Fähren, als Segler oder Motorbootfahrerkönnen Sichtungen von Schweinswalen melden	breit	Die Sichtungsdaten werden auf eine Online-Karte eingetragen und sind für alle Melder und die Öffentlichkeit einsehbar	gering	nur Sichtungen von Schweinswale melden	crowdsourcing	Forschung		Diese Erforschung trägt zu neuen Schutzmaßnahmen und somit einem besseren Schutz und mehr Kenntnis über heimischen Wal bei	Angewandte Forschung															x
Wissen was nutzt: Schlagen Sie Ihr Medizin-Thema für HTA-Berichte vor!	Deutschland	IQWiG - Institut für Qualität und Wirtschaftlichkeit im Gesundheitswesen	Ab Juli 2016	Online-Plattform	https://www.buergerschaffenwissen.de/projekt/wissen-was-nutzt-schlagen-sie-ihr-medizin-thema-fuer-hta-berichte-vor	Was bringt eine Untersuchungsmethode wirklich? Welche Vor- und Nachteile hat eine bestimmte Behandlungsform? Sie suchen nach Antworten auf solche Fragen und finden keine? Dann schlagen Sie beim ThemenCheck Medizin Ihr Thema vor, das wissenschaftlich untersucht werden sollte - um Ihre Fragen zu beantworten. Das IQWiG wählt aus den Vorschlägen der Bürgerinnen und Bürger Themen für sogenannte HTA-Be…	breit	Alle Bürger und Bürgerinnen , die Interesse an medizinische Themen haben ,	breit	Grundsätzlich werden alle Themen, zu denen sich eine wissenschaftliche Fragestellung formulieren lässt, in die öffentliche Themenliste beim ThemenCheck Medizin aufgenommen	mittel	Bürger und Bürgerinnen können medizinische Themen vorschlagen, zu denen sie umfassende und verständliche Informationen zum Stand der Forschung wünschen	distributed intelligence	Forschung , Bildung	medizinische Vor- und Nachteile eines Verfahrens wissen, Vorsorgemaßnahmen und Früherkennung über die Diagnostik, die medizinische Behandlung bis hin zur Rehabilitation wissen	In den HTA-Berichten werden stets Nutzen und Schaden eines medizinischen Verfahrens bewertet. Darüber hinaus werden auch, abhängig vom jeweiligen Thema, seine ökonomischen, ethischen, rechtlichen, sozialen und organisatorischen Auswirkungen auf die Gesundheitsversorgung von Patientinnen und Patienten berücksichtigt.	Angewandte Forschung				x	x
Plastikpiraten	Deutschland	Ecologic Institut, Kieler Forschungswerkstatt	Ab September 2016	Mitarbeit vor Ort, Online-Plattform	https://www.buergerschaffenwissen.de/projekt/plastikpiraten	Unsere Bäche, Flüsse und Ströme bringen neben Wasser auch Plastikmüll in die Meere und Ozeane. Dabei handelt es sich um Makroplastik, wie zerfetzte Plastiktüten, scharfkantige Joghurtbecher oder verknotete Kunststoffschnüre und Mikroplastik: Kleinstpartikel, die wir kaum noch wahrnehmen können. Im Meer gefährdet dieser Müll Tiere und gelangt in die marine Nahrungskette. Die Forschung kann auf ein…	eng	Nur Kinder und Jugendliche zwischen 10 und 16 Jahren können an der Aktion teilnehmen.	breit	Am ende der Aktion werden die Daten online veröffentlicht	hoch	die Kinder und Jugendliche sammeln , bearbeiten , dokumentieren und erheben Bundesweit Daten zu Kunststoffvorkommen an und in Fließgewässern	distributing intelligence	Forschung , Bildung ,Freizeit	wissen wie Bäche, Flüsse und Ströme bringen neben Wasser auch Plastikmüll in die Meere und Ozeane, wissen über Makroplastik und Plastikmüll	Aus den Daten der Forschung lassen sich Schutzmaßnahmen ableiten, die Flüssen, Meeren und letztlich uns selbst zugute kommen.	Grundlagenforschung	Vor Ort mit t wissenschaftlichen Methoden und in Gruppen zu arbeiten soll Spaß machen				x		x									x
Alpensteinbock in Bayern	Bayern	Landesbund für Vogelschutz in Bayern e.V. (LBV)	Ab August 2016	Online-Plattform, Meldebögen	https://www.buergerschaffenwissen.de/projekt/alpensteinbock-bayern	In den bayerischen Alpen kommen Steinböcke in den Allgäuer Hochalpen (Landkreis Oberallgäu), im Ammerwald (Garmisch-Partenkirchen), an der Benediktenwand (Bad Tölz), am Brünnstein (Rosenheim) und im Hagengebirge (Berchtesgadener Land) vor. Das genaue Wissen über die Höhe und Entwicklung des Bestandes ist in Bayern jedoch sehr begrenzt, weil im Gegensatz zu den anderen Alpenregionen keine systemat…	breit	Alle Personen , die durch bayerischen Alpen wandern gehen können Sichtungen von Steinbock melden	breit	Die Ergebnisse der einzelnen Steinbockmeldungen können auf einer Karte eingesehen werden.	gering	nur Sichtungen von Alpensteinbock melden	crowdsourcing	Forschung		die Vorkommen des Alpensteinbocks besser erforschen	Angewandte Forschung																x
KölnErforschen	Nordrhein-Westfalen	Koordinierungsstelle Wissenschaft und Öffentlichkeitsarbeit Arbeitsbereich Gasthörer- und Seniorenstudium, Universität zu Köln	Ab März 2007	Treffen und gemeinsame Arbeite	https://www.buergerschaffenwissen.de/projekt/koelnerforschen	Die Projektgruppe „Köln und die Region erforschen und erleben“ im Rahmen des Gasthörer- und Seniorenstudiums der Universität zu Köln besteht seit 2007 und hat in den vergangenen Jahren drei größere Projekte mit historischem und regionalem Bezug durchgeführt: „2000 Jahre Kölner Hafengeschichte“, „Die automobile Vergangenheit der Stadt Köln“ und „Kölner Plätze im Wandel der Zeit“. Das letztgenannte…	eng	Nur Seniorstudierende der Universität zu Köln können mitforschen	mittel	Ergebnisse werden in einem Projekt-Bericht festgehalten und bei Veranstaltung vorgestellt	hoch	. Aus vielen verschiedenen Blickwinkeln können Teilnehmende ihre eigenen Projekte entwickeln und erforschen.	participatory science	Forschung		Beitrag zur Weiterentwicklung der Stadtforschung	Angewandte Forschung					x
die Familienforscher	Deutschland	die Familienforscher	Ab September 2014	persönlich zwischen Kindern und deren Lehrern und Erziehern, ohne die Projekt verantwortlichen	https://www.buergerschaffenwissen.de/projekt/die-familienforscher	Wir ergreifen die Chance, mit Kindern erste historische und genealogische Forschungen zu betreiben und so Familien- und Ortsgeschichte lebendig werden zu lassen. Dabei soll der Schwerpunkt im praktischen Tun liegen, so dass Geschichte aktiv nacherlebt werden kann. Ziel: Zeitgeschichte kann packend sein und nachhaltig wirken, wenn sie im Kontext der eigenen Familien- oder Ortsgeschichte gelernt wi…	breit	Kinder und Jugendliche und deren Lehrer	eng	Besucher der Web-Seite , Schulklassen,	mittel bis hoch	für Lehrer hoch sie wählen selbst die Methoden aus für Kinder mittel sie forschen selbst an von den Lehrern gewählten Themen	participatory science	Bildung und Freizeit	Kinder lernen Familien und Ortsgeschichte kennen		Angewandte Forschung	Spaß haben am Forschen , Kinderspiele , Basteln				x
Fledermaus-Hausquartiere im Landkreis Fulda	Hessen	RhönNatur e.V. - Verein zur Förderung von Natur und Landschaft im Biosphärenreservat Rhön	Ab Juni 2016	Online-Plattform	https://www.buergerschaffenwissen.de/projekt/fledermaus-hausquartiere-im-landkreis-fulda	Fledermäuse sind nützliche und schutzwürdige Tiere, die seit über 50 Millionen Jahren in unseren Breitengraden leben. Wussten Sie, dass eine Fledermaus pro Nacht bis zu 5.000 Mücken fressen kann? Fledermäusen ein Quartier zu bieten, ist also nicht nur eine gute Tat im Sinne des Artenschutzes, sondern darüber hinaus auch nützlich für die Menschen. Im Raum Fulda leben 17 Fledermausarten, die im Frü…	breit	Alle Personen im Landkreis Fulda	eng?	die Daten gehen an die zuständigen Naturschutzbehörden	gering	Nur online Meldung von Fledermaus	crowdsourcing	Forschung		Beitrag zur Artenschutz	Angewandte Forschung																x
Amphibien taskforce	Bayern	Museum für Naturkunde, Bayrische Staatsforsten	Ab März 2015	Daten Per E-Mail schicken "salamander@mfn-berlin.de"	https://www.buergerschaffenwissen.de/projekt/amphibien-taskforce	Der Feuersalamander ist einer der wichtigsten Sympathieträger unter unseren Lurchen und wir möchten die Art besser verstehen. Dank seines individuellen Rückenmusters können wir einzelne Tiere zweifellos wiedererkennen und über viele Beobachtungen ihre Wanderungen, Lebensraumpräferenzen oder auch ihr Alter besser nachvollziehen. Außerdem möchten wir wissen, wie viele Tiere es überhaupt in unserem …	breit	Alle Personen mit Smartphone können Sichtungen von Salamander per E-Mail melden	breit	Die Daten werden auf einer Karte eingetragen. Eine Webseite, auf der die Ergebnisse vorgestellt werden, ist in Planung.	gering	lediglich Salamander fotografieren und den genauen Fundpunkt festhalten .dann die Daten per E-Mail schicken	crowdsourcing	Forschung		die einheimische Lurchen besser verstehen ,Beitrag zur frühzeitigen Erkennung der möglichen Gefahren	Angewandte Forschung																x
Opfer der NS-Euthanasie	Deutschland	Privat	Ab Mai 2015	Online-Plattform , Aufnahme von Daten per Post möglich	https://www.buergerschaffenwissen.de/projekt/opfer-der-ns-euthanasie	Dieses Projekt soll an die Unmenschlichkeit des NS-Regimes erinnern. In der Zeit des Nationalsozialismus wurden mit dem Ziel der Vernichtung „lebensunwerten Lebens“ mehr als 350.000 Menschen zwangssterilisiert. Bis zu 6.000 Frauen und ungefähr 600 Männer starben an den Folgen der Eingriffe, mehr als 300.000 weitere starben in den „Euthanasie“-Programmen. Die Überlebenden dieser Verbrechen mussten…	breit	Jeder kann ihm bekannte Daten zu Opfern der NS-Euthanasie	breit	Eingesendete Ergebnisse werden auf der Webseite im Online-Gedenkbuch oder unter der Rubrik Opferbiografien veröffentlicht	gering	Einsendung und Meldung von Daten Online und per Post	crowdsourcing	Forschung		Das Projekt trägt dazu bei, dem Vergessen entgegen zu wirken und den unzähligen Opfern Namen und Würde wieder zu geben. Familienforschung	Angewandte Forschung
EyeOnWater	Weltweit	ICBM, Universität Oldenburg NIOZ, Niederlande maris, Niederlande	Ab Oktober 2013	App "EyeOnWater-Colour"	https://www.buergerschaffenwissen.de/projekt/eyeonwater	Flüsse, Seen und Küsten sind sensible Ökosysteme, die neben natürlichen Vorgängen auch durch menschliche Einflüsse verändert und manchmal bedroht werden. Über Inhaltsstoffe im Wasser, wie Algen oder Sedimente, kann der Wasserzustand sichtbar gemacht werden. Algen erhöhen den Grünanteil, während Sedimente und Zersetzungsprozesse das Wasser braun färben. Ihre Dokumentation von verschiedenen Zeiten …	breit	Alle Personen mit Smartphone können mit Hilfe eiener App die Wasserfarbe messen	breit	Die gesammelten Daten werden auf einer Web-Seite dargestellt und somit sind die Daten für alle frei verfügbar	gering	Nur die Wasserfarbe mit Hilfe einer App messen	crowdsourcing	Forschung		die natürlichen Veränderungen von Meeren und Küsten oder Einflüsse durch den Menschen sichtbar machen und deren Folgen verstehen. Beitrag zum Schutz und Erhalt der Meeres- und Küstenumwelt	Angewandte Forschung														x		x
Genealogisches Postkartenarchiv	Deutschland	ohne Instituion entwickelt und privat geführt	Ab Januar 2016	Online-Plattform, Mitarbeit vor Ort	https://www.buergerschaffenwissen.de/projekt/genealogisches-postkartenarchiv	Das Projekt genpas (genealogisches Postkartenarchiv) dient der Strukturierung und digitalen Archivierung von Postkarten, die keinem Urheberrecht unterliegen und gelaufen sind. Im Vordergrund stehen der Kartentext und die Empfängeradresse. Das Motiv der Karte ist nicht primär relevant. Kernelement der Arbeit ist der Übertrag der altdeutschen Schriften in ein digitales Schriftformat, wodurch der Zu…	breit	Alle , die die altdeutsche Schrift lesen können oder diese erlernen möchten	breit	Die gesammelte Daten werden auf einer Web-Seite veröffentlicht	mittel	Die Daten sammeln und einsenden die altdeutsche Schrift	distributed intelligence	Forschung , Bildung	die altdeutsche Schrift erlernen ,Wissen über Genealogisches Postkartenarchiv	Familienforschung ,Speicherung historischer Informationen	Angewandte Forschung					x
Erforsche Neophyten mit!	Nordrhein-Westfalen	UND Kreisgruppe Bonn, Projekt " Erforsche Neophyten mit!" Projektträger BUND NRW e. V. Gefördert durch die Stiftung Umwelt und Entwicklung Nordrhein-Westfalen	Ab Dezember 2014	Projektwoche, Kurzausflug , Online-Plattform	https://www.buergerschaffenwissen.de/projekt/erforsche-neophyten-mit	Die Kreisgruppe Bonn des Bundes für Umwelt und Naturschutz Deutschland (BUND) bietet ein Citizen Science Projekt für junge ForscherInnen im Bonner Raum, das von der Stiftung Umwelt und Entwicklung NRW (SUE) gefördert wird. Im Rahmen dieses Projektes werden Kinder und Jugendliche (ab 10 Jahren) an die Erforschung einer Gruppe von gebietsfremden Pflanzen, einem aktuellen Forschungsthema, herangefüh…	eng	nur für Kinder und Jugendliche (ab 10 Jahren)	breit	Die Daten stehen der breiten Öffentlichkeit zur Verfügung, d. h. sind für jeden, sowohl für die jungen ForscherInnen als auch jeden Interessierten, BürgerInnen, Behörden, Forschergruppen, Verbände usw. frei zugänglich und nutzbar („open access“	hoch	Kinder und Jugendliche untersuchen Pflanzen und übertragen die Daten auf einer Webseite . Fortbildungen über das Thema für LehrerInnen, UmweltbildnerInnen und weitere Interessierte (MultiplikatorInnen) in Form von Seminaren und Exkursionen werden angeboten	distributed intelligence	Forschung , Bildung , Freizeit	Kinder und Jugendliche an Schulen und außerschulischen Bildungseinrichtungen an die Forschung heranführen und für die Sammlung von wissenschaftlichen Daten begeistern, Artenkenntnisse, Kenntnisse über die biologische Vielfalt, über Lebensräume, über den Einfluss menschlicher Aktivitäten auf die Natur, über die Dynamik der Natur, deren Bedrohungen und deren Schutz vermitteln	Neophyten im Bonner Raum erforschen, Daten und Informationen über die Verbreitung und Ökologie von Neophyten sammeln, die zu Forschungs- und Naturschutzzwecken verwendet werden,) Artenwahrnehmung und Wahrnehmung von Lebensräumen fördern	Angewandte Forschung	Ausflüge in die Natur machen				x											x
Picture Pile	Weltweit	International Institute for Applied Systems Analysis	Ab Oktober 2015	App "Picture Pile"	https://www.buergerschaffenwissen.de/projekt/picture-pile	Bei Picture Pile kannst du Wissenschaftlerinnen und Wissenschaftlern dabei helfen, globale Probleme wie Klimawandel und Unterernährung zu lösen, indem du zusammen mit anderen Spielern Bilderstapel sortierst. Der erste Bilderstapel, den es zu sortieren gilt, besteht aus 6 Millionen Bildern und behandelt die Abholzung in Tanzania. Mit den sortierten Bildern wird dann eine sehr genaue Waldbedeckungs…	breit	Alle Personen mit Smartphone	breit	Alle gesammelten Daten (außer Privatinformationen wie E-Mail Adresse der Spieler) werden nach einer Datenkontrolle für alle frei zugänglich zur Verfügung gestellt	gering	lediglich nur Bilder sortieren in einem Bilder-Spiel	distributed intelligence	Forschung ,Freizeit		Verbesserun der Landschaftsdatensätze, Beitrag zur Erforschung von Klimawandelschäden, Entwaldung und Artenvielfalt.	Angewandte Forschung	das Bilder-Spiel spielen		x											x
zeean [zi:n]	Weltweit	Potsdam Institut für Klimafolgenforschung	Ab Mai 2014	Online-Plattform	https://www.buergerschaffenwissen.de/projekt/zeean-zin	Wir wollen mit [zi:n] eine möglichst umfangreiche und komplette Datenbank schaffen, in der alle nationalen und internationalen Handels-, Waren- und Dienstleistungsströme der Weltwirtschaft erfasst sind. Ziel ist es, Ströme mit hoher geographischer und sektoraler Genauigkeit zu erfassen, also Länder → Bundesländer → Städte bzw. Metalle → Eisenwaren → Schrauben. Das besondere an [zi:n] ist, dass wi…	breit	Alle Bürgerinnen und Bürger ,die einen Computer mit Internetzugang haben können mitforschen	breit	Nach Überprüfung Infos-Quellen sind die Daten frei zugänglich als Online-Karten und perspektivisch auch als Rohdaten	gering	nationale und internationale Handelsdaten recherchieren und über eine Internetseite in eine Datenbanken einspeichern	distributed intelligence	Forschung , (Bildung)	wissen über Handelsnetzwerke	die hochkomplexen und teilweise sehr verwundbaren internationalen Handelsnetzwerke besser verstehen, damit sie besser an Störungen angepasst werden können	Angewandte Forschung													x	x
Archäologisches Spessart-Projekt e.V. - Institut an der Universität Würzburg	Bayern	Archäologisches Spessart-Projekt e.V. - Institut an der Universität Würzburg	Ab Oktober 1998	Mitarbeit vor Ort	https://www.buergerschaffenwissen.de/projekt/archaeologisches-spessart-projekt-ev-institut-der-universitaet-wuerzburg	Das Projekt befasst sich mit der Erforschung und Vermittlung der Kulturlandschaft Spessart und ihrer Randgebiete in bürgerschaftlichem Engagement. Ziele sind dabei gleichermaßen die wissenschaftliche Forschung zur Geschichte und Entwicklung der Kulturlandschaft wie die Stärkung der regionalen und lokalen Identität und des Bewusstseins für die Verletzlichkeit und Notwendigkeit der Pflege der Kultu…	breit	Alle Personen , die sich für Archäologie, Geschichte interessieren	breit	Die Ergebnisse werden publiziert, im Internet bereit gestellt, bzw. in Form der Kulturwege durch Infotafeln, Broschüren und virtuelle Rundwege im Internet der Öffentlichkeit vermittelt	stark	Bürger können sich auf allen Ebenen beteiligen, bei der unmittelbaren Forschungsarbeit, etwa auf den archäologischen Grabungen, beim Sammeln und Auswerten von Quellen und Daten, oder im Umfeld der Projekte im logistischen Bereich sowie bei der Vermittlung der Kulturlandschaft	extreme citizen science	Bildung, Forschung, Freizeit	Wissen über Archäologie, Geschichte ,Kultur	das Projekt beschäftigt sich mit allen Aspekten der Landschaft, besonders aber mit der historischen Genese, Entwicklung und Entstehung der Kulturlandschaft.	Angewandte Forschung	Treffen und gemeinsam arbeiten bzw. Forschen				x
umweltWIKI Sachsen	Sachsen	Ö GRAFIK, www.oe-grafik.de	Ab Oktober 2015	Online-Plattform	https://www.buergerschaffenwissen.de/projekt/umweltwiki-sachsen	umweltWIKI Sachsen dokumentiert das sächsische Umwelt-Engagement in den vergangenen 25 Jahren. Seit der Friedlichen Revolution 1989/90 engagierten sich zahlreiche Menschen und Initiativen in Sachsen für eine bessere Umwelt. Doch die wenigsten Akteure und Projekte sind Außenstehenden bekannt und nur schwer zu recherchieren. Das umweltWIKI Sachsen bietet künftig diese Möglichkeit.	breit	Alle Personen ,die einen Computer, ein Tablet oder ein Smartphone mit Internetzugang haben	breit	Die Ergebnisse werden auf einer Online-Plattform für jeden zugänglich publiziert.	gering	Aufzeichnungen, Fotos und andere Dokumente von Aktionen und Erlebnissen mitteilen.	crowdsourcing	Forschung		ein Grundstock für künftige wissenschaftlichen Auswertungen und Recherchen	Angewandte Forschung														x
Tatort Gewässer – dem CO2 auf der Spur	Deutschland	Leibniz - Institut für Gewässerökologie und Binnenfischerei	Ab September 2015	Online-Plattform	https://www.buergerschaffenwissen.de/projekt/tatort-gewaesser-dem-co2-auf-der-spur	Wir möchten die Zukunft unserer Gewässer erforschen. Im Fokus stehen fast 9000 Quadratkilometer Wasserfläche. Deshalb brauchen wir viele Helferinnen und Helfer! Im Rahmen dieses Projektes rufen wir Groß und Klein dazu auf, einmal im Zeitraum vom 2. bis zum 15. November Proben aus den Gewässern vor ihrer Haustür zu entnehmen. Uns Wissenschaftlerinnen und Wissenschaftler interessiert brennend: Welc…	breit	Alle interessierte Personen, Vorkenntnisse sind nicht erforderlich	breit	Die Gewässerdaten werden analysiert und ausgewertet und auf einer Web-Seite veröffentlicht	gering	Messen von Wassertemperatur, pH-Wert und Lichtverschmutzung, auch Wasser- und Sedimentproben entnehmen und einsenden.	distributed intelligence	Forschung		herausfinden ob Gewässer klimarelevantes Kohlendioxid (CO2) aufnehmen oder ausatmen. Herausfinden Wie hoch die Konzentration von klimarelevantem CO2 im Wasser ist und Welche Mikroorganismen leben in heimischen Gewässern und wie beeinflussen sie den CO2 – Kreislauf	Angewandte Forschung														x	x
SETI.Germany - informieren - lernen - beteiligen	Weltweit	BOINC	Ab August 2015	Online-Plattform	https://www.buergerschaffenwissen.de/projekt/setigermany-informieren-lernen-beteiligen	SETI.Germany ist das größte deutsche Team für Verteiltes Rechnen: wir unterstützen mit unseren Computern verschiedene wissenschaftliche Projekte. Unser Anliegen ist es, das Verteilte Rechnen in Deutschland und darüber hinaus zu verbreiten. Seit der Gründung beim namensgebenden Projekt SETI@home im Jahr 1999 sammeln wir Informationen zu den Projekten, bereiten diese auf und stellen das gesammelte …	breit	Alle Personen mit Computer, Laptop, Smartphone oder Tablet	eng und breit	Je nach Projekt, SETI ist kein Bürgerforschungsprojekt sondern Netzwerk verschiedener Projekte	gering	ein Programm installieren	crowdsourcing	unterschiedliche Projekte (eher Forschung)		Rechenleistung für Forschungsprojekte zur Verfügung stellen	Grundlagenforschung + Angewandte Forschung
YES! – Young Economic Summit	Deutschland	ZBW - Deutsche Zentralbibliothek für Wirtschaftswissenschaften, Leibniz-Informationszentrum Wirtschaft	Ab April 2015	Workshops	https://www.buergerschaffenwissen.de/projekt/yes-young-economic-summit	Das YES! – Young Economic Summit öffnet Türen für die Ideen der nächsten Generation. Das YES! bietet Schülerinnen und Schülern eine gemeinsame Plattform und die Werkzeuge für die Entwicklung von Lösungen für ökonomische, ökologische und gesellschaftliche Probleme. Sie übernehmen Verantwortung, sind die Stimme der nächsten Generation und diskutieren die globalen Herausforderungen der Gegenwart und…	eng	Schüler/innen, organisiert in Projektgruppen und begleitet von einer Lehrkraft	eng	die Schülerinnen und Schüler stellen die Ergebnisse im Rahmen des Schülerkongresses YES! – Young Economic Summit und bei Regionalfinalen der Öffentlichkeit vor.	hoch	Schüler/innen versuchen eine konkrete Lösungsidee für ein globales ökonomisches, ökologisches oder soziales Problem zu erarbeiten	participatory science	Bildung und Freizeit	die Entwicklung von Lösungen für ökonomische, ökologische und gesellschaftliche Probleme		Angewandte Forschung					x
Dem Plastikmüll auf der Spur	Deutschland	Kieler Forschungswerkstatt	Ab Mai 2015	Mitarbeit vor Ort	https://www.buergerschaffenwissen.de/projekt/dem-plastikmuell-auf-der-spur	Mit dem Citizen Science-Projekt „Dem Plastikmüll auf der Spur“ werden Schülerinnen und Schüler an einer wissenschaftlichen Untersuchung beteiligt, indem sie Proben am Strand nehmen, diese bezügl. der Plastikverschmutzung auswerten und die breite Öffentlichkeit über die aktuelle Problematik informieren. Das in einer Kooperation mit der Arbeitsgruppe Meeresbiologie der chilenischen Universität Cato…	eng	Das Projekt richtet sich an Schulklassen sowie andere Lerngruppen aus dem Kontext Schule	breit	Die Daten werden in internationalen wissenschaftlichen Zeitungen veröffentlicht und sind ebenso auf der Projektwebseite einsehbar	stark	Proben am Strand nehmen, diese bezügl. der Plastikverschmutzung auswerten und die breite Öffentlichkeit über die aktuelle Problematik informieren.	distributed intelligence	Bildung,Freizeit,Forschung	Schülerinnen und Schüler kennen das Plastikmüll-Problematik kennen und entwickeln Ansätze zum Thema Recycling, erforschen deren Wirksamkeit und diskutieren ihre Ideen.	die größten Plastikmüllvorkommen erkennen. Beitrag zur Erkenntnisse bei der Suche nach Lösungsansätzen zur Plastikmüllproblematik	Angewandte Forschung	gemeinsam am Strand Forschen soll spaß machen				x									x
Das Feuersalamander-Meldenetz	Hessen	Hessisches Landesamt für Naturschutz, Umwelt und Geologie	Ab Mai 2015	Online-Plattform	https://www.buergerschaffenwissen.de/projekt/das-feuersalamander-meldenetz	Unter dem Motto „Mach mit: Schau hin!“ hat Umweltministerin Priska Hinz als Schirmherrin auf dem Hessentag in Hofgeismar das Feuersalamander-Projekt gestartet. Durch die Mithilfe der hessischen Bürgerinnen und Bürger hoffen wir, mehr über die Häufigkeit und Verbreitung dieser Tierart in Hessen zu erfahren. Der im Volksmund als „Regenmännchen“ bekannte Feuersalamander ist mit seiner feuchten, schw…	breit	alle Personen im raum Hessen	eng	Die Daten werden aufbereitet und in der landesweiten hessischen Artendatenbank zusammengeführt	gering	lediglich Sichtungen von Feuersalamandern melden	crowdsourcing	Forschung		wissen über Feuersalamander und seinen Lebensraum	Angewandte Forschung																x
Das Geo-Wiki Projekt	Deutschland	Internationales Institut für Angewandte Systemanalyse (IIASA)	Ab Januar 2019	Online-Plattform	https://www.buergerschaffenwissen.de/projekt/das-geo-wiki-projekt	Geo-Wiki ist eine Online-Plattform für BürgerwissenschaftlerInnen, die bei der Verbesserung von globalen Daten speziell im Bereich der Landbedeckung und Landnutzung helfen möchten. Solche Landschaftsdaten, die auf Fernerkundung durch Satelliten aufbauen, sind für verschiedene wissenschaftliche Anwendungen wichtig, zum Beispiel für die Bestandsaufnahme von Ressourcen, für die Klimawandelforschung …	breit	Alle Personen , die Interesse an Karten haben	breit	später Die resultierenden Datensätze werden frei und ohne Beschränkung allen Interessierten zur Verfügung gestellt.	gering	Auf einer Karte verschiedene Orte zoomen und die dortige Bodenbedeckung auswerten. Fotos hochladen	distributed intelligence	Forschung		Beitrag zur Erforschung des Klimawandels und dessen schädlicher Auswirkungen, die weltweite Entwaldung oder den Verlust der Artenvielfalt. Verbesserung der Landschaftsdaten	Angewandte Forschung														x		x
Chimp&See	Weltweit	Max Planck Institute for Evolutionary Anthropology	Ab April 2015	Online-Plattform	https://www.buergerschaffenwissen.de/projekt/chimpsee	Studien zur menschlichen Evolution basieren meist auf den von unseren Vorfahren hinterlassene Fossilien und Artefakten. Wir können aber auch Rückschlüsse über den Ursprung des Menschen ziehen, indem wir unsere nächsten noch lebenden Artverwandten untersuchen: die Schimpansen und Menschenaffen in West- und Zentralafrika. Weil Menschen und Schimpansen sehr nah miteinander verwandt sind, können uns …	breit	Alle , die Interesse an Tierwelt haben und diese beobachten wollen	eng	die Ergebnisse sind für Forscherinnen und Forscher geeignet um Tierwelt weiter zu forschen ?	gering	Beim Betrachten der Videos Tierarten identifizieren und dokumentieren, was diese gerade machen. Die Schimpansen voneinander unterscheiden oder sie in verschiedenen Videos wiederzufinden.	distributed intelligence	Forschung, Freizeit		das Leben der Affen – ihre Gewohnheiten, Beziehungen und Lebensräume – zu verstehen und ein neues Verständnis der Herkunft des Menschen zu entwickeln. Potentielle evolutionäre Szenarien auswerten	Angewandte Forschung	Videos über Tierwelt betrachten
Phänologische Beobachtungen	Sachsen	Deutscher Wetterdienst, Abteilung Agrarmeteorologie	Ab April 2014	Online "E-Mail"	https://www.buergerschaffenwissen.de/projekt/phaenologische-beobachtungen	Die Phänologie befasst sich mit der Entwicklung der Pflanzen und Tiere im Jahresverlauf. Dabei werden regelmäßig wiederkehrende Wachstums- und Entwicklungserscheinungen wie Blühbeginn, Fruchtreife, Laubfall u.a.m. von typischen Zeigerpflanzen (z.B. Schneeglöckchen, Salweide, Schwarzer Holunder, Stieleiche) beobachtet und mitgeteilt. Durch die Einbeziehung von Schülerinnen und Schülern in die phän…	eng	Schülerinnen und Schüler können Pflanzen beobachten , Daten sammeln dann per E-Mail melden	breit	Die geprüften Beobachtungsdaten werden auf Internet veröffentlicht und stehen so zur wissenschaftlichen Bearbeitung zur Verfügung.	gering	Die Schülerinnen und Schüler beobachten über den Jahresverlauf die Eintrittstermine von 11 verschiedenen phänologischen Entwicklungsstufe, Die Termine werden in einen Meldebogen eingetragen und per E-Mail gemeldet.	distributed intelligence	Forschung		ein Beitrag zur Klimafolgenforschung	Angewandte Forschung														x
Digitale Dokumentation von Grabsteinen	Deutschland	CompGen - Verein für Computergenealogie e.V.	Ab Januar 2007	Online-Plattform , Fotos vor Ort machen	https://www.buergerschaffenwissen.de/projekt/digitale-dokumentation-von-grabsteinen	Die Bestattungskultur befindet sich in einem grundlegenden Wandel. Beerdigungen finden zunehmend anonym, in Friedwäldern oder auf See statt. Grabsteine werden seltener verwendet und verschwinden langsam von deutschen Friedhöfen. Anlass für die Projektgründung war ein Bericht über abgeräumte Grabsteine, die geschreddert werden sollten. Familiengeschichtsforschungsvereine können die Originalsteine …	breit	Alle , die Interesse an fotografieren von Grabsteine haben	breit	Die Ergebnisse werden in eine Datenbank hochgeladen. Die Datenbank ist ohne persönliche Registrierung kostenfrei weltweit einsehbar.	gering	lediglich fotografieren von Grabsteine	crowdsourcing	Forschung , Freizeit		Die Datenbank ist eine wichtige Quelle für die Familiengeschichtsforscher (Genealogen)	Angewandte Forschung	fotografieren
Füchse in der Stadt	Berlin-Brandenburg	Leibniz-Institut für Zoo- und Wildtierforschung (IZW), Rundfunk Berlin-Brandenburg (rbb), SWILD - Stadtökologie, Wildtierforschung, Kommunikation, Zürich	Ab Mai 2015	Online-Plattform, Mitarbeit vor Ort	https://www.buergerschaffenwissen.de/projekt/fuechse-der-stadt	Die weltweit zunehmende Verstädterung führt zur Besiedlung urbaner Räume durch verschiedenste Wildtierarten. Der Rotfuchs (Vulpes vulpes) ist inzwischen in einigen unserer Städte heimisch und auch Berlin gilt als flächendeckend besiedelt. Wie viele Füchse es in Berlin gibt und wie sie sich an das Leben in der Stadt anpassen, weiß man hingegen noch nicht: Wie bewegen und verhalten sich die Füchse?…	breit	Alle können mitmachen , Vorkenntnisse sind nicht notwendig	eng	alle auf der Website eingetragenen Tiersichtungen werden auch für die Bürger sichtbar sein - als frei zugängliche Online-Karte	gering , mittel	gering (Sichtungen von Focus melden ), mittel für diejenigen , die Aktiv mitforschen wollen	participatory science	Forschung		Beitrag zum Naturschutz in der Stadt, Lebensräume der Tiere besser verstehen	Angewandte Forschung														x		x
Alleen in Niedersachsen	Niedersachsen und Bremen	Niedersächsischer Heimatbund e.V.	Ab Mai 2015	Online-Plattform,App " Alleen-App"	https://www.buergerschaffenwissen.de/projekt/alleen-niedersachsen	Seit Jahrhunderten prägen Alleen das Landschaftsbild Niedersachsens. Sie sind wertvolles Naturgut und kulturhistorisch bedeutsam. Straßenbegleitende Alleen sind allerdings aufgrund des Ausbaus von Straßen und durch fehlende Nachpflanzungen in ihrem Bestand gefährdet. Bisher besteht auch weder bei Landkreisen noch bei Landesbehörden Kenntnis über den Umfang des Alleennetzes in Niedersachsen. Der N…	breit	Alle Personen mit Smartphone, Computer	eng	Am Ende des Projekts wird eine Publikation die Ergebnisse zusammenfassen und Bürgen und Behörden zur Verfügung stehen.	gering	fotografieren und melden von Alleen	distributed intelligence	Forschung		Die Forschung trägt zur Schaffung einer Übersicht über das Alleenetz in Niedersachsen mit dem Ziel der Erhaltung der Alleen bei	Angewandte Forschung														x		x
Literarische Altersbilder im Seniorenstudium	Nordrhein-Westfalen	Universität zu Köln, Gasthörer- und Seniorenstudium	Ab April 2014	Treffen und gemeinsame Arbeit, Vorlesungen	https://www.buergerschaffenwissen.de/projekt/literarische-altersbilder-im-seniorenstudium	In der Projektgruppe „Literarische Altersbilder“ analysieren Seniorstudierende Altersbilder in der zeitgenössischen Literatur und veröffentlichen die Ergebnisse ihrer Arbeit im Internet und in Fachzeitschriften. Im Zuge des demographischen Wandels ist das Alter zu einem zentralen literarischen Motiv geworden. In Romanen von Autorinnen und Autoren wie beispielsweise Martin Walser, Monika Maron ode…	eng	Nur Seniorstudierende der Universität zu Köln können mitforschen	breit	Die Ergebnisse werden auf einer Web-Seite veröffentlicht, Die Projektgruppe stellt ihre Arbeit aber auch im Rahmen von Vortrags- und Diskussionsveranstaltungen vor	mittel	Die Projektgruppe untersucht, ob und inwieweit in der Gegenwartsliteratur neue Bilder des Alters und Alterns entworfen werden	distributed intelligence	Forschung		Beitrag zur aktuellen Forschung im Schnittfeld von Literaturwissenschaften und Alter(n)Wissenschaften	Angewandte Forschung
Die Apfelblütenaktion	Deutschland	SWR Fernsehen	Ab Januar 2005	Online-Plattform	https://www.buergerschaffenwissen.de/projekt/die-apfelbluetenaktion	Auch im Frühjahr 2017 ruft Planet Wissen wieder sein Publikum in Fernsehen und Internet dazu auf, die ersten Apfelblüten des Frühlings an die Redaktion zu melden. In den vergangenen neun Jahren haben wir auf diese Art und Weise bereits 27.000 Meldungen sammeln können. Diese Daten stehen nun Klimaforschern zur weiteren Auswertung zur Verfügung. Mit jedem weiteren Beobachtungsjahr steigt die Chance…	breit	Alle können mitmachen , Vorkenntnisse sind nicht notwendig	eng	Ergebnissen werden für wittere wissenschaftliche Arbeit verwendet	gering	Die Teilnehmer der Aktion melden verschiedene Blühphasen der Apfelbäumen	distributed intelligence	Forschung		Beitrag zur Klimaforschung	Angewandte Forschung														x
Sächsisches Gemeinschaftsprojekt .:webgenealogie:.	Sachsen	Sächsisches Gemeinschaftsprojekt .:webgenealogie:.	Ab Januar 2007	Online-Plattform	https://www.buergerschaffenwissen.de/projekt/saechsisches-gemeinschaftsprojekt-webgenealogie	Das Projekt trägt Informationen der Familien- und Heimatgeschichte Sachsens online zusammen und bündelt sie. Grundlage dafür sind entsprechende Primärquellen. Nutzer können hier Informationen über historische Personendatensätze abrufen. Durch die Veröffentlichung wird ein größerer Kontaktkreis erreicht und Doppelarbeiten von Familien- und Heimatforschern in Archiven werden vermieden.	breit	Alle Personen , die Interesse an Ahnenforschung ,r Familien- und Heimatforschung haben	eng	Die Ergebnisse der Forschung und die erfassten Daten werden über die eigenen Datenbanken kostenfrei der Öffentlichkeit zur Nutzung angeboten . Nach einer Registrierung kann jeder den Spuren der ehemaligen Einwohner Sachsens folgen	mittel bis stark	Interessierte haben die Möglichkeit ihre eigene Forschungsergebnisse in Web darstellen .Transkribieren, Erfassen, Übersetzen.	participatory science	Forschung		Beitrag zur Ahnenforschung	Angewandte Forschung
Igel in Bayern zählen	Bayern	Bayerischer Rundfunk/Kompetenzfeld Wissen & Landesbund für Vogelschutz LBV	Ab März 2015	Online-Plattform, App „Igel in Bayern“	https://www.buergerschaffenwissen.de/projekt/igel-bayern-zaehlen	Ziel des Projekts „Igel in Bayern“ ist es, Details der Verbreitung der in Bayern heimischen Igel zu erheben und unser Wissen darüber zu verbessern, welche Strukturen für eine gesunde Igelpopulation günstig sind, wo vielleicht nur noch wenige oder keine Igel mehr vorkommen und mögliche Ursachen dafür herauszufinden. Es geht auch darum, das Bewusstsein für einen naturnahen Garten und natürliche Vie…	breit	Alle Interessierte können melden, wann und wo sie einen Igel gesehen haben,	eng	Die Daten laufen in einer Datenbank zusammen und alle Funde sind in Echtzeit auf einer Seite einsehbar.	gering	lediglich Sichtungen von Igel melden	crowdsourcing	Forschung		Igel und seiner Lebensraum besser verstehen und diese verbessern	Angewandte Forschung																x
Landschaft im Wandel	Sachsen	Leibniz-Institut für ökologische Raumentwicklung, Leibniz-Institut für Gewässerkunde, Leibniz-Zentrum für Agrarlandschaftsforschung, Akademie für Raumforschung und Landesplanung, Hochschule Darmstadt	Ab Januar 2015	Online-Plattform	https://www.buergerschaffenwissen.de/projekt/landschaft-im-wandel	Ziel dieses Forschungsprojektes ist die Dokumentation des Landschaftswandels mit Hilfe von Fotopaaren - ein historisches Foto wird dazu mit einem aktuellen Bild des jeweiligen Motivs verglichen. Daran schließen sich Untersuchungen zur landschaftlichen Vielfalt, deren Veränderung und den Auswirkungen auf die Landschaftsfunktionen an. Darüber hinaus thematisiert das Projekt, wie der Landschaftswand…	breit	Alle, die alte Landschaftsfotos aus Sachsen in ihren Alben haben	breit	längerfristig größeres Bürgerprojekt mit Datenportal (unklar ob das offen zugänglich ist)	gering	alte Landschaftsfotos heraussuchen und die gleichen Bildausschnitte neu fotografieren	distributed intelligence	Forschung		die Dokumentation des Landschaftswandels	Angewandte Forschung																x
enviroCar	Weltweit	52°North Initiative for Geospatial Open Source Software GmbH	Ab Juli 2013	Online-Plattform ,App	https://www.buergerschaffenwissen.de/projekt/envirocar	enviroCar ist eine offene Citizen Science Plattform, auf der Sie als Bürger eingeladen sind, sich aktiv mit dem Thema Mobilität und Umwelt zu befassen. Mit Hilfe eines Bluetooth OBD-II-Adapters, einem Android Smartphone und der kostenlosen enviroCar App können Sie auf die Sensordaten Ihres Fahrzeuges zugreifen und den Einfluss des Fahrens auf Faktoren wie beispielsweise den Energieverbrauch, die …	breit	Alle Personen mit Auto	breit	breit	gering	Mit einem handelsüblichen OBD-II-Bluetooth Adapter und einem Android Smartphone können eigene Fahrten mit dem Auto aufgezeichnet und analysiert werden	crowdsourcing	Forschung		Beitrag zur Verkehrsforschung	Angewandte Forschung												x
Flora von Bayern	Bayern	Staatliche Naturwissenschaftliche Sammlungen Bayerns mit dem SNSB IT Zentrum, Botanische Staatssammlung München, Bayerisches Landesamt für Umwelt	Ab Oktober 2013	Online-Plattform , Mitarbeit vor Ort , Praktika ,Workshops	https://www.buergerschaffenwissen.de/projekt/flora-von-bayern	Ziel des vom WWF Deutschland und dem Bayerischen Landesamt für Umwelt geförderten Projekts ist es, alle in Bayern vorkommenden Gefäßpflanzen einschließlich der natürlich vorkommenden, neu eingebürgerten, invasiven, aber auch der gegenwärtig ausgestorbenen Arten zu beschreiben. Die Veränderungen im Auftreten der Pflanzen über Zeit und Raum - besonders in den letzten Jahrzehnten - wird erfasst und …	breit	Alle An der Botanik Interessierte können mitmachen	breit	Die Daten werden in einem zentralen Datenbanksystem zusammengeführt und sind später über nationale Portale sowie in internationalen Netzwerken wissenschaftlicher Daten wie über GBIF (www.gbif.org) und GFBio (www.gfbio.org) abrufbar	gering, mittel , stark (je nach Teilnehmer)	Einzelfunde melden, Pflanzenbilder und Bilddaten melden, Gezielt Pflanzenmaterial beitragen Vorträge. Treffen und Exkursionen im Kalender eintragen. Recherchen im Herbarium in München durchführen. Literaturrecherchen durchführen. Flora von Bayern (=BFL)-Wiki-Mitarbeiter werden. BFL Datenbank-Mitarbeiter werden. An Vorträgen, Arbeitstreffen und Exkursionen teilnehmen. Regionalen botanischen Verein…	distributed intelligence	Forschung , Bildung	Praktikum absolvieren . Teilnahme an Vorträgen und Exklusionen	Daten über Pflanzenwelt in Bayern sammeln . Ermöglichen von einem Grundlage sinnvoller Schutzmaßnahmen für Arten und Lebensräume.	Angewandte Forschung					x											x
C.S.I. Pollen	Europa	Karl-Franzens-Universität Graz	Ab April 2014	Mitarbeit vor Ort, Online-Plattform	https://www.buergerschaffenwissen.de/projekt/csi-pollen	Honigbienen sammeln nicht nur Nektar, sondern auch Pollen. Dieser stellt die einzige Eiweißquelle für Bienen dar. Wie für Menschen gilt auch für Bienen: Vielfalt ist besser als Einfalt, denn die Pollen verschiedener Pflanzen können sich hinsichtlich ihrer Qualität stark unterscheiden. Gemeinsam mit Imkerinnen und Imkern untersuchen wir in den Jahren 2014 und 2015 die Diversität des von Bienen ges…	eng	Imkerinnen und Imker können mitmachen	eng	Die Teilnehmerinnen werden von den Koordinatoren über den Projektfortschritt und Ergebnisse auf dem Laufenden gehalten. Die Ergebnisse werden den Teilnehmerinnen mitgeteilt	gering	Die TeilnehmerInnen sammeln Proben und erfassen deren Daten	distributed intelligence	Forschung , Bildung	Imkerinnen und Imkern lernen mehr über Bienenvolk und ihre Ernährung	Ursachen des Bienensterbens herausfinden. Herausfinden ob die Pollendiversität in der Stadt höher als am Land ist und Wie steht es um die Pollenversorgung in der Nähe von Monokulturen	Angewandte Forschung					x											x
Stunde der Wintervögel	Deutschland	Landesbund für Vogelschutz in Bayern e.V.	Ab Januar 2018	Online-Plattform , Meldungen postalisch oder per Telefon-Hotline möglich	https://www.buergerschaffenwissen.de/projekt/stunde-der-wintervoegel	Über unsere Vögel im Winter gibt es bislang wenig wissenschaftliche Erkenntnisse. Wie passen sie sich an die kalte und futterarme Jahreszeit an? Welche Arten werden durch Winterfütterung gefördert, welche nicht? Wie wirkt sich der Klimawandel auf die Vögel im Winter aus? Diese und andere Fragen wollen der LBV und sein Partnerverband NABU mit der „Stunde der Wintervögel“ beantworten. Im Mittelpunk…	breit	Alle Bürger, die Interesse und Zeit haben können eine Stunde lang an einem frei wählbaren Zeitpunkt und Ort sämtliche Vögel zu zählen	breit	Sämtliche Beobachtungen werden in einer Datenbank gesammelt, die Online-Meldungen werden live im Internet ausgewertet. Eine interaktive Karte und Liste zeigen die aktuellen Ergebnisse	gering	lediglich beobachten von Vögel , diese zählen und melden	crowdsourcing	Forschung		flächendeckende Erkenntnisse über die Entwicklung der Vogelwelt im Siedlungsraum zu gewinnen.	Angewandte Forschung																x
DES - DatenErfassungsSystem	Deutschland	Verein für Computergenealogie e.V	Ab Januar 2012	Online-Plattform	https://www.buergerschaffenwissen.de/projekt/des-datenerfassungssystem	Die Digitalisierung historisch wertvoller Quellen - wie beispielsweise Adressbücher, Standesamtunterlagen, Kriegsgräberlisten, Sterberegister, Vermissten oder Verlustlisten - spielt heute eine wichtige Rolle in der historischen Forschung. Durch Digitalisierung werden die Informationen der Originaldokumente auf lange Zeit gesichert und durch Transkription sind diese referenzierbar und können über …	breit	Alle ,die Interesse an Ahnenforschung, Geschichte haben	breit	Die fertig erfassten Daten sind frei und kostenlos für Interessierte verfügbar.	gering	Transkription der Informationen von hochauflösenden Fotografien der jeweiligen Quellen in Textform	distributed intelligence	Forschung		Beitrag zur Ahnenforschung, Digitalisierung von Quellen.	Angewandte Forschung
Invasive Neophyten entdecken und melden!	Deutschland	Koordinationsstelle Invasive Neophyten in Schutzgebieten Sachsen-Anhalts beim UfU e. V. (KORINA)	Ab Juni 2010	Online-Plattform ,App KORINA-App	https://www.buergerschaffenwissen.de/projekt/invasive-neophyten-entdecken-und-melden	Invasive Neophyten sind Pflanzen, die seit 1500 n. Chr. in Deutschland eingeschleppt oder eingeführt wurden und jetzt hier negative Auswirkungen haben. Sie gefährden die heimische Biodiversität und zum Teil auch die menschliche Gesundheit. Um sie sinnvoll, wirksam und kosteneffizient kontrollieren zu können, braucht es das Wissen über Vorkommen, Verbreitung und Auswirkungen dieser Pflanzen. Doch …	breit	Alle , Personen mit Smartphone	bereit	Die Ergebnisse werden in eine Online-Datenbank aufgenommen und sind sofort im Neophyten-Atlas auf einer Internetseite und auf der Karte in der App sichtbar	gering	lediglich Funde von Neophyten melden	distributed intelligence	Forschung		Erkennen ob Maßnahmen gegen die invasiven Arten zu initiieren nötig sind . ein genaueres Bild der Verbreitung der Arten bekommen.	Angewandte Forschung																x
Altes Leipzig	Sachsen	IG Altes-Leipzig	Ab Januar 2010	Online-Plattform	https://www.buergerschaffenwissen.de/projekt/altes-leipzig	Das Projekt möchte die Entwicklung der Stadt Leipzig von 1750 bis zum 2. Weltkrieg mit seinen Personen und Einwohnern, Bauten und architektonischen Veränderungen erforschen und erlebbar machen. Während der Industrialisierung wuchs Leipzigs Einwohnerzahl als bedeutender Handels- und Messestandort rasant an. So kamen ständig neue Ideen, Technologien und Unternehmertum in die Stadt, prägten sie und …	breit	Alle Personen , die Interesse an Leipzig-Geschichte haben	eng	die Daten kostenlos und frei zugänglich für Interessierte	gering	Eingabe von Sterbe-, Heirats- und Geburtsanzeigen in eine Online-Datenbank	distributed intelligence	Forschung		Beitrag zur Genealogie und Familienforschung	Angewandte Forschung
ArtenFinder Rheinland-Pfalz	Rheinland-Pfalz	KoNat UG (Koordinierungsstelle für ehrenamtlich erfasste Naturschutzdaten in Rheinland-Pfalz)	Ab März 2011	Online-Plattform, App	https://www.buergerschaffenwissen.de/projekt/artenfinder-rheinland-pfalz	In dem in Rheinland-Pfalz seit 2011 erfolgreich laufenden ArtenFinder-Portal können Bürgerinnen und Bürger ihre Tier- und Pflanzenbeobachtungen in eine gemeinsame digitale Datenbank eintragen und so einen Datenpool zum zeitlichen und räumlichen Auftreten von wildlebenden Tieren, Pflanzen und Pilzen erarbeiten. Hierdurch leisten die Teilnehmenden einen wertvollen Beitrag zur Erforschung der region…	breit	Alle Personen mit Smartphone oder PC	eng?	Meldungen werden von den Melderinnen und Meldern selbst, von an den Daten interessierten Landesforschern, von Naturschutzverbänden und vom behördlichen Naturschutz verwendet, zwei Bestimmungsbücher für Vögel bzw. Tagfalter in Rheinland-Pfalz erarbeitet	gering	Tier-, Pflanzen- und Pilzarten melden	distributed intelligence	Forschung		Beitrag zur Erforschung von Ursachen für räumliche und zeitliche Veränderungen in der Tier- und Pflanzenwelt	Angewandte Forschung																x
GBOL - German Barcode of Life	Deutschland	Zoologisches Forschungsmuseum Alexander Koenig - Leibniz-Institut für Biodiversität der Tiere	Ab Oktober 2011	Online-Plattform	https://www.buergerschaffenwissen.de/projekt/gbol-german-barcode-life	Das GBOL-Projekt hat das Ziel, die Artenvielfalt aller deutschen Tiere, Pilze und Pflanzen anhand ihres genetischen DNA-Barcodes (Fingerabdrucks) zu erfassen. Damit übernimmt Deutschland als Wissenschaftsnation eine führende Rolle in einem internationalen Konsortium aus Naturkundemuseen, Zoos, Herbarien, Forschungseinrichtungen und staatlichen Institutionen, die den Aufbau einer „DNA Barcode Bibl…	eng	nur erfahrene Spezialisten für eine bestimmte Organismengruppe können mitmachen	eng	Die Ergebnisse werden für Herstellung „DNA-Barcode“ Datenbank verwendet	gering	Sammlung von frischem Tier- oder Pflanzenmaterial Konservierung und taxonomische Bestimmung des gesammelten Materials Ausfüllen der GBOL-Sammlungsdatenbögen mit relevanter Zusatzinformation die Daten sammeln und einsenden	distributed intelligence	Forschung		Aufbau einer genetischen Barcode-Bibliothek der Fauna und Flora Deutschlands mit den dazugehörigen Belegexemplar-, Gewebe- und DNA-Sammlungen. Entwicklung von Strategien zur effizienten Erzeugung und wissenschaftlichen, ökonomischen, und naturschutzrelevanten Anwendung von DNA-Barcodes.	Angewandte Forschung																x
Expedition Münsterland	Nordrhein-Westfalen	Arbeitsstelle Forschungstransfer, Westfälische Wilhelms-Universität Münster	Ab August 2010	Mitarbeit vor Ort	https://www.buergerschaffenwissen.de/projekt/expedition-muensterland	Die Expedition Münsterland versteht sich als Brücke zwischen Wissenschaft und Gesellschaft, um einerseits das Wissen aus der Universität Münster der Bevölkerung, den Unternehmen und Kommunen der Region zu vermitteln und um andererseits den Austauschprozess zwischen Region und Universität anzuregen. Getreu dem Motto: die Region nutzen und ihr nützen. Die verschiedenen Kooperationsprojekte greifen …	breit	Teilnahme offen für Bürgerschafft , Unternehmen , Schulklassen etc.	breit	Einerseits profitiert Wissenschaft von lokalen Wissen der Bürgerschafft . Anderseits profitiert Region von neun Erkenntnissen .	stark	Bürger können selber Themen vorschlagen und sind an allen Schritten der Forschung beteiligt	participatory science	Forschung , Bildung , Freizeit	Wissenschaft näher kennenlernen und neue Erkenntnisse über Region . Inhalte für Seminare an der Uni	Wissen über die Region generieren	Angewandte Forschung	Exkursionen ,Ausflüge , Radtouren				x													x
yoyo@home - Rechenplattform für Naturwissenschaften	Weltweit	Rechenkraft.net e.V.	Ab Mai 2007	Online-Plattform	https://www.buergerschaffenwissen.de/projekt/yoyohome-rechenplattform-fuer-naturwissenschaften	yoyo@home unterstützt Projekte kleinerer Forschungsgruppen und von Einzelpersonen aus verschiedenen naturwissenschaftlichen Disziplinen (z.B. Evolutionsforschung, Partikel-Physik, Mathematik), die einen enormen Rechenbedarf haben. Dabei geht es sowohl um angewandte Forschung, als auch um Grundlagenforschung. yoyo@home ist ein verteiltes Rechenprojekt, welches die Rechenkapazitäten von Heimcompute…	breit	Alle Personen mit Rechner	breit	Die Ergebnisse werden öffentlich zur Verfügung gestellt	gering	Den eigenen Rechner einfach am Projekt anmelden, die entsprechende Software herunterladen und ungenutzte Rechenzeit den wissenschaftlichen Aufgaben spenden	crowdsourcing	Forschung		je nach Projekt .(z.B. Evolutionsforschung, Partikel-Physik, Mathematik)	Grundlagenforschung
Projekt Roadkill	Europa	Institut für Zoologie, Universität für Bodenkultur, Wien	Ab März 2014	Online-Plattform, App	https://www.buergerschaffenwissen.de/projekt/projekt-roadkill	In diesem Projekt wird es Ihnen ermöglicht, an einem wissenschaftlichen Projekt zum Thema „Roadkill“ aktiv mitzuarbeiten. Es wird erhoben, welche Tiere auf Straßen zu Tode kommen und welche Gründe es dafür geben könnte. Mit Ihren Daten werden Hotspots identifiziert (s.u.) und es wird versucht, diese Brennpunkte zu entschärfen.	breit	alle Personen mit Smartphone oder PC	eng	Die Ergebnisse werden für Forschungszweige verwendet	gering	melden von toten Tieren, welche von einem Fahrzeug erfasst wurden	crowdsourcing	Forschung		Wissenschaftlicher Erkenntnisgewinn und entsprechende Publikationen, 2.) Sensibilisierung der teilnehmenden Personen für das Thema Roadkill, 3.) Identifizierung von Roadkill Hotspots und möglicher Entschärfung derselben in Kooperation mit NGOs und öffentlichen Einrichtungen und, eine Vision von uns, 4.) Implementierung der Daten in Navigationsgeräte um vor neuralgischen Straßenabschnitten warnen …	Angewandte Forschung										x
Die große Hirschkäfer-Pirsch	Hessen	Hessisches Landesamt für Naturschutz, Umwelt und Geologie (HLNUG) Schutzgemeinschaft Deutscher Wald, Landesverband Hessen	Ab Mai 2007	Online-Plattform, per Post	https://www.buergerschaffenwissen.de/projekt/die-grosse-hirschkaefer-pirsch	Wir wollen herausfinden, wo in Hessen Hirschkäfer leben. Wir möchten Menschen diese eindrucksvolle Käferart näher bringen und vermitteln, welche spannenden Tierarten es auch im unmittelbaren Wohnumfeld zu entdecken gibt. Der Hirschkäfer ist eine für jede Bürgerin, jeden Bürger leicht zu erkennende Käferart. Gleichzeitig haben die Tiere eine komplizierte Biologie und sind nach 5-8 Jahren Larvensta…	breit	Jede/r im Raum-Hessen kann mitmachen	eng	Alle Melderinnen und Melder erhalten eine Rückmeldung mit Informationen zum Hirschkäfer. Die Daten werden in eine Datenbank eingegeben	gering	Sichtungen von Hirschkäfer melden	crowdsourcing	Forschung		Überblick über die Verbreitung der Art in Hessen . Beitrag zur Artenschutz	Angewandte Forschung																x
African Plants - A Photo Guide	Weltweit	Senckenberg Forschungsinstitit und Naturmuseum Biodiversität und Klima Forschungszentrum (BiK-F)	Ab April 2014	Online-Plattform	https://www.buergerschaffenwissen.de/projekt/african-plants-photo-guide	„African Plants“ ist gleichzeitig Bestimmungswerkzeug und Fotoarchiv. Wir verschlüsseln jede Pflanzenart mit 18 Merkmalen, die man (auch in Kombination mit Familien/Gattungen) zur Suche nutzen kann. Das Suchergebnis mit Fotos hilft bei der weiteren Bestimmung. Damit schließen wir eine wichtige Lücke in der Bestimmungsliteratur, vor allem für das tropische Afrika.	breit	jede/r kann mit machen	breit	die Ergebnisse sind in eine Datenbank zu finden .Fotoanfragen (z.B. für Feldführer, wissenschaftliche Publikationen, Bücher über Heilpflanzen) werden vermittelt	gering	Fotos einsenden	crowdsourcing	Forschung		Beitrag zu einer Datenbank ,diese könnte für verschiedene Zwecke verwendet werden	Angewandte Forschung
Animal Tracker	Deutschland	Max-Planck-Institut für Ornithologie, Vogelwarte Radolfzell	Ab Juni 2014	Online-Plattform, App	https://www.buergerschaffenwissen.de/projekt/animal-tracker	Auf den Spuren von Weißstorch, Waldrapp und Co.: Verfolgen Sie mit dem Animal Tracker die Routen von Wildtieren auf der ganzen Welt fast in Echtzeit! Wo sich die Tiere auch befinden, mit dem Animal Tracker sind Sie stets dabei – dank GPS-Signalen, die winzige Sender auf dem Rücken der Tiere senden und die in der Online-Datenbank Movebank gespeichert werden. Diese Plattform wird von Hunderten von …	breit	Alle , die Interesse haben Tiere in der Natur zu beobachten	breit	Die Daten werden in einer App veröffentlicht	gering	lediglich Beobachtungen eingeben und Fotos hochladen	distributed intelligence	Forschung		die Auswirkung der Klimaerwärmung besser zu verstehen, Tierarten vor dem Aussterben zu retten und die Ausbreitung von Krankheiten durch Tiere vorhersagen zu können.	Angewandte Forschung																x
GOV - Geschichtliches Ortverzeichnis	Deutschland	Verein für Computergenealogie e.V., CompGen	Ab Januar 1992	Online-Plattform	https://www.buergerschaffenwissen.de/projekt/gov-geschichtliches-ortverzeichnis	Die genaue Angabe von Orten ist in der Familienforschung ein unerlässliches Hilfsmittel. Gerade im Bereich der Genealogie liegen oftmals nur unvollständige Ortsinformationen oder Ortsinformationen zu längst vergangenen Strukturen vor und erschweren das Auffinden von wichtigen Archivunterlagen. Um die Ortsverwaltung zu vereinfachen und um qualitativ hochwertige Daten für alle Interessierten bereit…	breit	Jeder Interessierte kann nach Anmeldung (kostenlos) an dem Projekt teilnehmen	breit	Alle Ergebnisse sind bereits während des Erfassungsprozess sofort online und werden auch in Zukunft als Open Access-Daten kostenlos und frei zugänglich sein	gering	Daten erfassen	distributed intelligence	Forschung		Beitrag zur Ahnenforschung, Geschichte	Angewandte Forschung
KLEKs	Deutschland	Institut für Kulturlandschaftsforschung e.V.	Ab September 1999	Online-Plattform	https://www.buergerschaffenwissen.de/projekt/kleks	Mit KLEKs wurde das erste Geoinformationssystem in Deutschland entwickelt, mit dem historische Kulturlandschaftselemente nach einer ganzheitlichen Methodik digital aufgenommen werden konnten. Seit 1999 wurden über eine Viertelmillion Datensätze erfasst. KLEKs ist keine behördeninterne Datenbank, sondern versteht sich als Teilbaustein einer Plattform für das bürgerschaftliche Engagement für die Be…	breit	Jede Interessierte kann mitmachen	breit	Die Daten sind über eine Website einsehbar und stehen für unterschiedliche Nutzungen zur Verfügung - Umweltbildung, Landschaftsplanung, Heimatforschung, Tourismus.	gering	Daten erfassen . Fotos hochladen	distributed intelligence	Forschung		Baustein für eine flächendeckende Kulturlandschaftsplanung im Sinne der Europäischen Landschaftskonvention	Angewandte Forschung
Einstein@Home – Astrophysik für alle	Weltweit	Max-Planck-Institut für Gravitationsphysik Hannover (Albert-Einstein-Institut Hannover)	Ab Februar 2005	Online-Plattform	https://www.buergerschaffenwissen.de/projekt/einsteinhome-astrophysik-fuer-alle	Neutronensterne sind Überreste explodierter Sterne und bestehen aus extrem dichter Materie. Sie lassen sich mittels Radiowellen und im Gammalicht entdecken und senden Gravitationswellen aus – von Einstein vorhergesagte Raumzeitkräuselungen, die Astronom*innen erstmals im September 2015 nachwiesen. Ihr könnt den Forschern dabei helfen, indem ihr bei Einstein@Home ungenutzte Rechenzeit auf euren Co…	breit	Alle Personen mit Rechner oder Smartphone	eng	die Ergebnisse werden auf einer Webseite vorgestellt, die Beteiligten bekommen die Infos über die neue Eindeckungen	gering	lediglich ein App installieren	crowdsourcing	Forschung		Entdeckung neuer Neutronensterne, die Entstehung und das Leben von Sternen besser verstehen. Mehr über die Gravitationswellen wissen	Angewandte Forschung
Natur im Wandel der Zeit	Deutschland	WissenLeben e.V.	k.a.	Online-Plattform	https://www.buergerschaffenwissen.de/projekt/natur-im-wandel-der-zeit	Wie kann man die Tatsachen des Klimawandels so vermitteln, dass sie nicht nur bekannt sind, sondern so begriffen werden, dass sie langfristig zum nachhaltigen Handeln motivieren? Eine Möglichkeit dazu sind Projekte, bei denen TeilnehmerInnen regelmäßig und langfristig Veränderungen in der Natur beobachten - mit Fokus auf Vögel, Pflanzen, Insekten, Wasser und Klima, sowie auf mögliche zeitliche Ve…	breit	Alle ,die Interesse an Natur, Naturwissenschaften und Nachhaltigkeit haben.	breit	Die Daten werden in eine Datenbank eingegeben	gering	Beobachtung langfristiger Veränderungen in der Natur - mit Fokus auf Vögel, Pflanzen, Insekten, Wasser und Klima, sowie auf mögliche zeitliche Verschiebungen zwischen Pflanzen, Raupen und Nistzeitraum	distributed intelligence	Forschung , Bildung	Heranführen junger Menschen an die Schönheit und die faszinierenden Eigenheiten der Natur, um sie dazu zu motivieren, sich für den Erhalt der Natur einzusetzen.	Wecken von Verständnis und Interesse für naturwissenschaftliche Forschung. Erhöhen des Verständnisses für die Auswirkungen des Klimawandels auf die Natur.	Angewandte Forschung					x									x
Meilensteine der motorischen Entwicklung im Kleinkindalter	Deutschland	Staatsinstitut für Frühpädagogik München (IFP) Projekt Meilensteine	Ab Juli 2013	Online-Plattform	https://www.buergerschaffenwissen.de/projekt/meilensteine-der-motorischen-entwicklung-im-kleinkindalter	Krabbeln, Greifen, Stehen – Babys und Kleinkinder bewältigen viele Herausforderungen bis sie laufen können! Ziel der Forschungsstudie Meilensteine ist es, grundlegende Daten zur Bewegungsentwicklung im Säuglings- und frühen Kindesalter zu erheben. Dabei sind wir auf die Unterstützung von Eltern als „MitforscherInnen“ angewiesen – denn sie sind ExpertInnen, wenn es darum geht die Entwicklungsschri…	eng	Teilnehmen können alle interessierten Mütter und Väter mit Kindern im ersten Lebensjahr (bis 12 Monate).	eng	Die Daten werden streng vertraulich behandelt, ausschließlich für das genannte Forschungsvorhaben verwendet und nicht an Dritte weitergeben. alle teilnehmenden Familien erhalten auf Wunsch die Ergebnisse der Studie	gering	TeilnehmerInnen können anhand eines Entwicklungskalenders die Entwicklungsschritte bzw. „motorischen Meilensteine“ beobachten, dokumentieren und an das Forschungsteam melden.	distributed intelligence	Forschung		Die Studie soll grundlegende Erkenntnisse über die Bewegungsentwicklung im Kleinkindalter bis zum sicheren und freien Gehen liefern	Angewandte Forschung
Stunde der Gartenvögel	Deutschland	Naturschutzbund Deutschland (NABU)	Ab Mai 2016	Online-Plattform	https://www.buergerschaffenwissen.de/projekt/stunde-der-gartenvoegel	Viele Menschen haben das Gefühl, dass wir uns früher häufiger am Gesang von Zaunkönig, Singdrossel oder Star erfreuen konnten. Beruhen diese Befürchtungen auf Tatsachen oder verklären wir die vermeintlich „gute alte Zeit“? Das wollen der NABU und sein bayerischer Partner LBV herausfinden. Natürlich soll bei der bereits seit 2005 jeweils am zweiten Mai-Wochenende bundesweit stattfindenden Aktion a…	breit	Alle Bürger, die Interesse und Zeit haben können eine Stunde lang an einem frei wählbaren Zeitpunkt und Ort sämtliche Vögel zu zählen	breit	Sämtliche Beobachtungen werden in einer Datenbank gesammelt, die Online-Meldungen werden live im Internet ausgewertet. Eine interaktive Karte und Liste zeigen die aktuellen Ergebnisse	gering	lediglich beobachten von Vögel , diese zählen und melden	crowdsourcing	Forschung		flächendeckende Erkenntnisse über die Entwicklung der Vogelwelt im Siedlungsraum zu gewinnen.	Angewandte Forschung																x
naturgucker.de	Europa	naturgucker.de gemeinnützige eG	Ab Februar 2008	Online-Plattform, App	https://www.buergerschaffenwissen.de/projekt/naturguckerde	naturgucker.de ist eine Online-Plattform und verfolgt primär das Ziel, Menschen für die Natur und ihre Beobachtung zu begeistern. Unser Motto ist dabei: Jede Naturbeobachtung ist eine gute Nachricht aus der Natur. Dabei ist es nicht wichtig ob etwas besonders selten ist oder nur schön aussieht. Beobachtungen zu Amseln, Kleinem Fuchs und Gänseblümchen sind genau so wichtig wie zu bedrohten Arten. …	breit	Jeder kann sich auf der Online-Plattform www.naturgucker.de registrieren und mitmachen	breit	Die gesammelten Beobachtungsdaten werden von Naturschutzorganisationen (NABU etc.) für ihre Naturschutzarbeit genutzt. Die Beobachtungsdaten sind direkt für jeden Interessierten ohne Einschränkung einsehbar und auch auswertbar	gering	Naturbeobachtungen melden und Naturbilder aus Deutschland und weltweit hochladen	distributed intelligence	Forschung		Die Daten bilden einen großen Pool, der für Natur- und Artenschutz genutzt wird und zukünftig eine unschätzbare Informationsquelle zu dann aktuellen Entwicklungen sein wird.	Angewandte Forschung																x
Finde den Wiesenknopf	Deutschland	Helmholtz-Zentrum für Umweltforschung - UFZ	Ab April 2012	Online-Plattform	https://www.buergerschaffenwissen.de/projekt/finde-den-wiesenknopf	Der Große Wiesenknopf (Sanguisorba officinalis) ist ein Indikator für die biologische Vielfalt in seinen Lebensräumen. Viele Insekten nutzen ihn als Nektarquelle und für die Eiablage, und für zwei Schmetterlinge - den Hellen Wiesenknopf-Ameisenbläuling (Maculinea teleius) und den Dunklen Wiesenknopf-Ameisenbläuling (Maculinea nausithous) – ist er sogar die alleinige Raupennahrungspflanze. Wir wol…	breit	Alle Natur begeisterte können mitmachen	eng	Die Fundorte werden auf einer Webseite dargestellt. In einer Fotogalerie werden die von den Teilnehmern eingesendeten Fotos präsentiert.	gering	Pflanzen, Tiere beobachten. Daten sammeln , Fotos hochladen	distributed intelligence	Forschung		der Einfluss des Managements auf die Vorkommen von S.officinalis und der Wiesenknopf-Ameisenbläulinge besser verstehen	Angewandte Forschung																x
Verlust der Nacht App	Weltweit	Leibniz-Institut für Gewässerökologie und Binnenfischerei	Ab Februar 2013	App "Verlust der Nacht"	https://www.buergerschaffenwissen.de/projekt/verlust-der-nacht-app	Ein tagheller Nachthimmel, künstlich angestrahlt durch unzählige Lichter. Was unschätzbare Vorteile bringt, hat auch eine Schattenseite: Die Lichtverschmutzung – verstanden als die Verschmutzung des natürlichen, nächtlichen Lichts verursacht durch künstliche Beleuchtung – nimmt zu. Die Auswirkungen auf Mensch und Natur durch künstliches Licht sind bisher weitestgehend unbekannt. In diesem Projekt…	breit	Alle Personen mit Smartphone	eng	Aus den Ergebnissen entstehen Karten, die die Helligkeitsverteilung und ihre Entwicklung über die Jahre aufzeigen. Wissenschaftler können diese Daten nutzen, um Aussagen über die Veränderung der Lichtverschmutzung treffen zu können	gering	mit Hilfe einer App Lichtverschmutzung, Himmelhelligkeit und die Sichtbarkeit der Sterne messen	distributed intelligence	Forschung		Beitrag zur Erfindung von Lösungsansätze für moderne Beleuchtungskonzepte und nachhaltige Techniken	Angewandte Forschung
Insekten Sachsen	Deutschland	Sächsische Landesstiftung Natur und Umwelt, Naturschutzfonds Arbeitskreis Entomologie im NABU Landesverband Sachsen e. V.	Ab März 2011	Online-Plattform, App, Workshops	https://www.buergerschaffenwissen.de/projekt/insekten-sachsen	„Insekten Sachsen“ ist eine Onlineplattform, auf welcher Wissen zur Artbestimmung, zur Lebensweise, zum Vorkommen und zur Bestandssituation der schätzungsweise 25.000 Insektenarten in Sachsen zusammengetragen wird. Aufgrund der hohen Artenvielfalt ist es erwünscht, dass sich möglichst viele Leute an dieser Arbeit beteiligen, denn selbst so wird es noch Jahre dauern, bis die meisten Insektenarten …	eng	Erkenntnisse über Insekten-Welt sind erforderliche , diese können in Workshops erworben werden	eng	Die Daten werden von Spezialisten untersucht ,und überprüft. Aussagefähige Multimediadateien aus den Fundmeldungen werden von den Spezialisten bei den Artsteckbriefen und in der Bestimmungshilfe eingebunden	gering	Insekten fotografieren und melden , Daten sammeln	distributed intelligence	Forschung , Bildung	Wissen über Insektenwelt	Die Daten werden für die Erstellung Roter Listen herangezogen, welche die Bestandssituation der Arten einschätzen. Außerdem finden die Daten über das Vorkommen der Arten Eingang in naturschutzfachliche Planungen	Angewandte Forschung					x											x
Mückenatlas	Deutschland	Leibniz-Zentrum für Agrarlandschaftsforschung ZALF, Friedrich-Loeffler-Institut, Bundesforschungsinstitut für Tiergesundheit FLI	Ab April 2012	Online-Plattform, postalisch	https://www.buergerschaffenwissen.de/projekt/mueckenatlas	Das Projekt „Mückenatlas" unterstützt aktuell laufende Forschungsarbeiten zum Stechmücken-Monitoring in Deutschland. Über Stechmücken und ihre Verbreitung gibt es in Deutschland derzeit nur wenige gesicherte Daten. Um die Verbreitung der Mückenarten in Deutschland flächendeckend zu erfassen, haben die Wissenschaftlerinnen und Wissenschaftler des Leibniz-Zentrums für Agrarlandschaftsforschung ZALF…	breit	jeder kann mitmachen ohne Vorkenntnisse	eng	Der Einsender erhält ein Antwortschreiben mit dem Bestimmungsergebnis. Nachfolgend wird der gesamte Datensatz zum Nachweis der Mücke in die deutsche Stechmücken-Datenbank CULBASE aufgenommen, wo auch andere Mückennachweise, z.B. nach Fallenfängen zusammengeführt werden. Erst dann erscheint der auf der Homepage gesetzte Nachweispunkt für den Einsender.	gering	lediglich Mücken fangen, einfrieren, abschicken	distributed intelligence	Forschung		Ermittlung eines Status quo für Deutschland	Angewandte Forschung
Igel in der Stadt	Berlin-Brandenburg	Leibniz-Institut für Zoo- und Wildtierforschung (IZW), Interdisziplinärer Forschungsverbund (IFV) Biodiversität, Berlin-Brandenburgisches Institut für Biodiversitätsforschung (BBIB)	Ab Juni 2013	Online-Plattform, App"anymals & plants", Meldungen per Post möglich	https://www.buergerschaffenwissen.de/projekt/igel-der-stadt	Wo kommen Igel in Berlin vor? Wie haben Igel sich in ihrer Lebensweise an die Großstadtbedingungen angepasst? Gibt es Unterschiede bei der Nahrung, Parasitenbelastung, körperlichen Verfassung, Fortpflanzung und Sterblichkeit zwischen „Stadtigeln“ und „Landigeln“? Wie beeinflussen die wärmeren Stadtbedingungen oder die menschlichen Aktivitäten das Verhalten von Igeln z.B. den Winterschlaf? Durch d…	breit	Alle können mitmachen , Vorkenntnisse sind nicht notwendig	eng	Die Daten werden in einem Portal einsehbar sein .	gering	lediglich Sichtungen von Igel melden	crowdsourcing	Forschung		Beitrag zur Einschätzung des Populationsstatus und Kenntnis der verschiedenen Bedrohungsfaktoren von Igeln in Berlin	Angewandte Forschung																x
artigo - Laien beschreiben Kunstwerke	Weltweit	Institut für Kunstgeschichte der Universität München, Institut für Informatik der LM	Ab April 2012	Online-Plattform	https://www.buergerschaffenwissen.de/projekt/artigo-laien-beschreiben-kunstwerke	Die Kunstgeschichte verfügt über große Bilddatenbanken, die inhaltlich erschlossen werden müssen, wenn man in ihnen etwas finden soll. Denn selbst einfachste Suchen - etwa nach Hunden in Bildern - kann der Computer nicht eigenständig durchführen. Dafür wird die Hilfe eines Menschen benötigt, der dieses Bild mit dem Begriff „Hund“ versehen haben muss.	breit	Alle können mitmachen , Vorkenntnisse sind nicht notwendig	breit	Die Daten stehen im Internet für alle zur Verfügung	gering	Bilder beschreiben ,und passsende Begriffe eingeben	distributed intelligence	Forschung , Freizeit		Vereinfachung der Suche nach Kunstwerk	Angewandte Forschung	im Wettbewerb in einem Bilder-Spiel mit den anderen Spielern spielen
Tauchen für den Naturschutz	Deutschland	NABU Gransee e.V	Ab April 2014	Mitarbeit vor Ort	https://www.buergerschaffenwissen.de/projekt/tauchen-fuer-den-naturschutz	Der Zustand der Klarwasserseen in Norddeutschland hat sich in den letzten Jahren dramatisch verschlechtert. Dieser Zustand ist vom Ufer aus oft nicht zu erkennen, da sich die Veränderungen unterhalb der Wasseroberfläche abspielen. Mit Hilfe der Sporttaucher und mit der Unterstützung von Naturschützern/Botanikern wollen wir mittels Makrophytenkartierungen einen Überblick über den Zustand eines See…	eng	Sporttauchergruppen und Tauchverbände können mitmachen, Kenntnisse über Wasserpflanzen und Lebewesen der Region können vorher in einer Schulung erworben werden	eng	Die Ergebnisse werden von den beteiligten besprochen und diskutiert und werden sie auf einem Internetportal gesammelt	mittel bis stark	Das Leben unter Wasser untersuchen , Daten sammeln , Fotos aufnehmen	distributed intelligence	Forschung , (Bildung)	Sporttaucher werden für die Vielfalt der Unterwasserwelt sensibilisiert.	Die gesammelten Daten dienen der Bestands- und Zustandsaufnahme der aktuellen Situation der Klarwasserseen	Angewandte Forschung															x
SenseBox - Die Kiste mit Sinn	Weltweit	Institut für Geoinformatik - Westfälische Wilhelms-Universität Münster	Ab April 2014	teilweise online, teilweise vor Ort	https://www.buergerschaffenwissen.de/projekt/sensebox-die-kiste-mit-sinn	Die SenseBox ist ein Do-it-yourself-Bausatz für stationäre und mobile Sensoren. Mit der SenseBox können Bürger, z. B. Schüler, Umweltdaten über Klima, Luftqualität, Verkehrsaufkommen, Lärmbelästigung und vieles mehr positionsbezogen messen und so zu genaueren Aussagen über lokale Umweltphänomene beitragen. Die Daten werden im Internet als Open Data bereitgestellt und auf einer Karte sichtbar gema…	breit	jeder kann mitmachen	breit	die Ergebnisse zur Luftdaten sind online verführbar	mittel bis stark	entweder ein Box bauen und automatisch Daten übertragen aber auch eigene Analysen , und Programmierung möglich	distributed intelligence	Forschung , Bildung	sensibilisieren für Umwelt und Luftqualität	generieren von Daten von Umweltfaktoren	Angewandte Forschung				x	x							x		x
Tagfalter-Monitoring Deutschland (TMD)	Deutschland	Helmholtz-Zentrum für Umweltforschung - UFZ	Ab April 2014	Online-Plattform	https://www.buergerschaffenwissen.de/projekt/tagfalter-monitoring-deutschland-tmd	Ziel ist es, mehr über die Situation der Tagfalter in Deutschland zu erfahren. Welche Arten werden seltener, welche breiten sich aus und welche Aussagen lassen diese Trends für die Biodiversität insgesamt zu? Durch die kontinuierliche Mitarbeit der vielen Freiwilligen entstehen Datensätze, mit denen die Situation zahlreicher Arten erstmals fundiert beurteilt werden kann und es ergeben sich neue E…	breit	jeder , der Freude daran hat, in der Natur unterwegs zu sein und etwa 1-2 Stunden Zeit pro Woche erübrigen kann, kann sich beteiligen	eng	Die gesammelte Daten werden in eine Datenbank eingegeben , die ausgewertete Daten werden als gedruckte Broschüren an alle Beteiligte verschickt	gering	lediglich Tagfalter zählen	distributed intelligence	Forschung		Kenntnisse über die Bestandssituation und -entwicklung der Tagfalter, Beitrag zur weiteren Forschungs- und Naturschutzprojekte	Angewandte Forschung																x
SAIN – Städtische Agrikultur	Nordrhein-Westfalen	Fraunhofer-Institut für Umwelt-, Sicherheits- und Energietechnik UMSICHT Wissenschaftsladen Bonn e.V.	Ab Oktober 2017	Mitarbeit vor Ort	https://www.buergerschaffenwissen.de/projekt/sain-staedtische-agrikultur	Ob Balkongarten, Stadtfarm oder Aquaponikanlage: Die Nahrungsmittelversorgung in Städten wird schon jetzt durch viele lokale Aktivitäten unterstützt. Betrieben werden sie meist von engagierten Bürger*innen, die sich oft hohes Spezialwissen angeeignet haben. Der Wissenschaftsladen Bonn und Fraunhofer UMSICHT wollen dieses Wissen gemeinsam mit Bürger*innen bündeln, Technologien und Produktionsanlag…	breit	Alle , die Interesse an Agrikultur haben können mitmachen,. Falls Spezialwissen benötigt wird, werden Workshops zur Wissens- und Fähigkeiten Vermittlung veranstaltet	eng	Die Ergebnisse und erhobenen Daten werden gemeinsam in den monatlichen Netzwerktreffen besprochen. Die Projektwebseite informiert regelmäßig über die letzten Aktivitäten und Ergebnisse der Treffen	mittel bis Stark	Bürger*innen arbeiten eng mit Stadtfarmer*innen und dem Projektteam zusammen, um gemeinsam Konzepte für verschiedene Herausforderungen einer funktionierenden städtischen Agrikultur zu entwickeln	participatory science	Forschung ,Bildung	Agrikultur näher kennenlernen	Das Projekt möchte die Resilienz der Städte fördern, d.h. den Selbstversorgungsgrad der Stadt erhöhen.	Angewandte Forschung			x		x							x	x
Mikroplastik auf der Spur: Mitforschen im Citizen Lab	Hessen	Philipps-Universität Marburg	Ab September 2018	Mitarbeit vor Ort	https://www.buergerschaffenwissen.de/projekt/mikroplastik-auf-der-spur-mitforschen-im-citizen-lab	Wir Menschen des 21. Jahrhunderts leben im Plastikzeitalter: Plastik findet in allen Bereichen des menschlichen Lebens Anwendung und ermöglicht uns einen hohen Lebensstandard. Dabei ist Plastik so selbstverständlich geworden, dass es zur Einweg- und Wegwerf-Ressource degradiert ist. Große Mengen landen weltweit als Plastikmüll in der Umwelt und gelangen vor allem in Meere und Ozeane, wo sie in im…	breit	Alle , die Interesse an umweltwissenschaftlichen Fragestellungen und praktischen (Labor-)Tätigkeiten haben können mitforschen	breit	Die Ergebnisse werden der Öffentlichkeit zugänglich gemacht: Die Funde werden auf einer Online-Plattform in eine dynamische Karte eingetragen. Weiterhin werden die Ergebnisse in Fachzeitschriften publiziert.	mittel	Mitarbeit im Labor .1) Beschaffung von Sedimentproben von Flüssen und Seen in Marburg und Umgebung. 2) Entfernung des Sandes mit einem speziellen Apparat, dem sogenannten Microplastic Sediment Separator. 3) Detektion mittels Fluoreszenz- und Lichtmikroskopie sowie Dokumentation der Plastikpartikel	distributed intelligence	Forschung , Bildung	tiefe Einblicke in aktuelle Umweltforschung	Beitrag zur Bekämpfung der globalen Umweltverschmutzung durch Mikroplastik.die Gesellschaft informieren und eine Datengrundlage für politische Akteure zu bilden	Grundlagenforschung					x									x
Landauf. LandApp - Entdecke Dein BaWü!	Baden-Württemberg	LEO-BW	Ab März 2019	App	https://www.buergerschaffenwissen.de/projekt/landauf-landapp-entdecke-dein-bawue	Mit Deiner Hilfe möchten wir Bau-, Kultur- und Naturdenkmäler überall in Baden-Württemberg kartieren. Wir freuen uns, dass Du BaWü-EntdeckerIn werden möchtest! Gemeinsam spüren wir mit dieser App auf, was es in Baden-Württemberg zu sehen gibt! Dabei interessieren uns Deine Entdeckungen und Lieblingsorte, egal in welchem Winkel unseres Bundeslandes. Denn wer kennt die besser als Du? In LEO-BW find…	breit	Alle können mitmachen , Vorkenntnisse sind nicht notwendig	breit	Die Daten sind über eine interaktive Karte sichtbar und stehen für weitere Projekte zur Verfügung	gering	Fotos aufnehmen und hochladen mit einer kurzen Ortsbeschreibung	crowdsourcing	Forschung , Freizeit		Bau-, Kultur- und Naturdenkmäler überall in Baden-Württemberg kartieren.	Angewandte Forschung	Naturdenkmäler und schöne Orte über die Karte in der App entdecken
Categories to Come	Weltweit	Spread The Ner, Österreich forscht , Schweiz forscht, Johanna Barnbeck ,	Ab März 2019	Online-Plattform	https://www.buergerschaffenwissen.de/projekt/categories-come	So Vieles dreht sich um das Eine - und doch fehlen uns manchmal die Worte. Wie sprechen wir mit wem über unsere Körper, unsere Vorlieben, Handlungen und Bedürfnisse, wenn es um Sex und sexuelle Befriedigung geht? Jede*r ist nicht nur dazu eingeladen die eigene Sexualität in Worte zu fassen, sondern auch neue Worte und Fantasien zu schaffen. Ziel des Projektes ist es, eine Plattform und Ressourcen…	breit	Alle Personen ab 18 Jahren	breit	Diese Datensammlung wird öffentlich bereitgestellt und kann für linguistische, sozial- und sexualwissenschaftliche, gender-, medien- oder literaturbezogene Forschungsfragen sowie zur Kunstproduktion herangezogen werden.	gering	lediglich Online-Formular ausfüllen	distributed intelligence	Forschung		Aufbau einer neuen Ressource für die Erforschung von Sexualität in verschiedenen Disziplinen	Grundlagenforschung
Änderung: Hund und Eidechse	Berlin-Brandenburg	Technische Universität Berlin	Ab April 2017 (Abgeschlossen)	Online-Plattform , Workshops?	https://www.buergerschaffenwissen.de/projekt/aenderung-hund-und-eidechse	Die gesetzlich geschützten Zauneidechsen sind in Berlin noch relativ weit verbreitet. Jedoch ist mit einem zukünftigen Abnehmen der Bestände zu rechnen. Dazu tragen unter anderem die Bautätigkeit in der Stadt und der damit einhergehende Lebensraumverlust bei. Welche Faktoren sich außerdem negativ auf die Art auswirken, soll in einer Forschungsarbeit geklärt werden. Als ein eventuell wichtiger Fak…	breit?	Alle Interessierte können mitmachen , notwendige Kenntnisse können in Workshops erworben werden	eng	Die Ergebnisse fließen in eine Forschungsarbeit ein	gering?	unauffällig Hunde auf verschiedenen Grünflächen in der ganzen Stadt zählen und über ihre Anzahl und ihr Verhalten Auskunft dokumentieren und abgeben	crowdsourcing	Forschung		Erschaffung einer verlässliche, wissenschaftlich fundierte Grundlage für den Stadtplanern und Artenschützern	Angewandte Forschung																x
Bestäuberkrise bei Hummeln?	Europa	aktion-hummelschutz.de	Ab März 2017 (Abgeschlossen)	Online-Plattform	https://www.buergerschaffenwissen.de/projekt/bestaeuberkrise-bei-hummeln	Sind in Ihrer Region Hummeln bereits selten? Werden Pflanzen wegen der fehlenden Insekten nicht mehr bestäubt? Durch ein Experiment wollen wir genau das herausfinden. Gerade Hummeln sind sehr wichtige Bestäuber. Denn von den 100 Pflanzenarten, mit denen die Menschen zu 90 Prozent ihre Ernährung bestreiten, werden mehr als 70 Arten von (Wild-) Bienen und Hummeln bestäubt. Die Zahl der Bestäuber ha…	breit	Alle können mit machen , Vorkenntnisse sind nicht notwendig	breit	Die Ergebnisse werden Online vorgestellt .Teilnehmer erhalten die Ergebnisse per E-Mail. Die Daten werden Hochschulen zur weiteren Verwertung angeboten.	gering	lediglich in einem bestimmten Zeitraum die Samen, die durch Hummel-Bestäubung entstanden sind zählen und diese melden	distributed intelligence	Forschung		Kenntnis über das Ausmaß einer Bestäuberkrise . eine Grundlage, für den Schutz von Hummeln voranzutreiben.	Angewandte Forschung																x
#fischdetektive	Deutschland	Geomar Helmholtz-Zentrum für Ozeanforschung Kiel Bundesministerium für Bildung und Forschung	Ab November 2016 (Abgeschlossen)	Mitarbeit vor Ort	https://www.buergerschaffenwissen.de/projekt/fischdetektive	Das Projekt #fischdetektive will im Wissenschaftsjahr 2016*17 - Meere und Ozeane zusammen mit Kindern und Jugendlichen fragen: Wo kommt der Fisch, den wir essen, her? Wie erkenne ich, ob ein Fisch aus einem nachhaltig befischten Bestand kommt? Wie groß und alt war der Fisch, als er gefangen wurde? Und wie kann sich der Verbraucher sicher sein, dass Fisch und Meeresprodukte auch korrekt bezeichnet…	eng	Kinder und Jugendliche(10 bis 16-Jährige)	breit	Die Ergebnisse werden auf einer Webseite sichtbar sein .Abschließend werden die Ergebnisse des Projektes in den Medien veröffentlicht und fachwissenschaftlich publiziert.	mittel	Probenahme und Daten sammeln	distributed intelligence	Forschung , (Bildung)	Kenntnisse über Fischarten	genetische Flossenabdrücke unserer Speisefische erstellen und deren Herkunft untersuchen.	Angewandte Forschung			x
Wie isst man 2000 Watt?	Baden-Württemberg	Naturschule Region Bodensee e.V. Plattform Nachhaltiges Lernen	Ab September 2015 (Abgeschlossen)	Mitarbeit vor Ort	https://www.buergerschaffenwissen.de/projekt/wie-isst-man-2000-watt	Aktuelle Studien ergeben, dass rund 1/3 der Lebensmittel im Müll landen. Lebensmittel werden aber mit erheblichem Energie-Aufwand von den Höfen produziert sowie von ihren nachgelagerten Stellen wie z. B. der Mühle, Bäckerei und Gastronomie verarbeitet, transportiert und gelagert. Der hier entstehende „ökologische Fußabdruck“ kann z. B. in der Energieeinheit „Watt“ dargestellt werden: so benötigt …	breit	Auszubildende und Bürger in Radolfzell	breit	Ergebnisse werden veröffentlicht über wissenschaftliche Artikel , Zeitungen und von Multiplikatoren. Mit dem Ziel dazu beizutragen Lebensmittelvereschwendung zu reduzieren	mittel	Teilnehmende sind bei allen Schritten involviert außer der Konzeption des Projekts	participatory science	Forschung , Freizeit , Bildung	Umgang mit Lebensmitteln	Untersuchen wie viele Lebensmittel warum und wann weggeschmissen wird und wie sich das vermeiden lässt	Angewandte Forschung	gemeinsame Treffen und Kochen und Ausflüge auf einem Hof				x								x	x
iSPEX: WIE SAUBER IST DER HIMMEL ÜBER BERLIN?	Berlin-Brandenburg	MINT Impuls e.V. Berlin	Ab September 2015(Abgeschlossen)	App	https://www.buergerschaffenwissen.de/projekt/ispex-wie-sauber-ist-der-himmel-ueber-berlin	In diesem Projekt wird die Luftverschmutzung durch Feinstaub in der Luft gemessen. Es ist nicht einfach, dies richtig zu messen: Man braucht sehr vielen Messungen an möglichst vielen Orten, um aussagekräftige Daten zu erhalten. In mehr als 10 Städten europaweit wird zwischen dem 1. September und dem 15. Oktober 2015 die Luftverschmutzung mit mehr als 5.000 iPhones und dem iSPEX-Aufsatz gemessen. …	breit	Alle, die ein iPhone 4, 4S, 5 oder 5S besitzen können mitmachen	eng	Am Projektende werden die gesammelten Daten von einem Team von Wissenschaftlern ausgewertet und auf der Webseite und in einem wissenschaftlichen Fachblatt publiziert.	gering	mehrere Messungen am Tag bei sonnigem Wetter durchführen	distributed intelligence	Forschung		die Auswirkung von Feinstaub beurteilen	Angewandte Forschung				x
Reden Sie mit!	Europa	Ludwig Boltzmann Gesellschaft	Ab April 2015 (Abgeschlossen)	Online-Plattform	https://www.buergerschaffenwissen.de/projekt/reden-sie-mit	Betroffenheit schafft Wissen: Reden Sie mit! Bringen Sie Ihre Beobachtungen über psychische Erkrankungen in die Forschung ein, stellen Sie Ihre Erfahrungen einem Team aus SpitzenforscherInnen der Ludwig Boltzmann Gesellschaft zur Verfügung! Diese gehen den gelegten Spuren nach und gewinnen daraus neue Ansätze der Forschung: Welche ungelösten Fragen zu psychischen Erkrankungen soll die Wissenschaf…	breit	Alle können mitmachen , Vorkenntnisse sind nicht notwendig	breit	Die identifizierten Forschungsthemen werden auf der Plattform – Reden Sie mit! – bekanntgegeben und alle registrierten Teilnehmerinnen zu einem TeilnehmerInnen-Voting eingeladen. Danach wird eine internationale Fachjury die Forschungsthemen beurteilen.	gering	Beobachtungen im Umgang mit psychischen Krankheiten über eine online Plattform einreichen	distributed intelligence	Forschung		Das Ziel ist die Generierung neuer Forschungsfragen im Bereich psychischer Erkrankungen als Basis für zukünftige Forschungsprojekte	Grundlagenforschung				x
Migräne Radar 2.0	Deutschland	Hochschule für Angewandte Wissenschaften Hof	k.a. (Abgeschlossen)	Online-Plattform	https://www.buergerschaffenwissen.de/projekt/migraene-radar-20	Das Projekt Migräne Radar untersucht, welche Faktoren Migräneanfälle auslösen können. Dabei soll beispielsweise auch der häufig von Patienten vermutete, aber wissenschaftlich noch nicht nachgewiesene, Zusammenhang zwischen Wetterphänomenen und Migräneanfällen geklärt werden.	eng	Migräne Patienten können mitmachen	eng	Die gesammelten Daten werden auf einer Migräne-Landkarte dargestellt	mittel	einmal einen Standard-Migränefragebogen ausfüllen , Migräneanfälle kontinuierlich melden . Für die Phase der Datenauswertungen können Teilnehmer Vorschläge machen, welche Zusammenhänge untersucht werden sollen	distributed intelligence	Forschung		Das Projekt trägt dazu bei, Migräne und die Migräneanfall-auslösenden Faktoren besser zu verstehen. Beitrag zur Verbesserung der Beratung und Behandlung von Migränepatienten	Angewandte Forschung				X
Archäologisches Surveyprojekt Steigerwald - Fatschenbrunn	Bayern	Otto-Friedrich-Universität Bamberg	Ab März 2015 (Abgeschlossen)	Mitarbeit vor Ort	https://www.buergerschaffenwissen.de/projekt/archaeologisches-surveyprojekt-steigerwald-fatschenbrunn	Das Archäologische Surveyprojekt Steigerwald - Fatschenbrunn befasste sich mit der Geschichte der Kulturlandschaft und ihrer landwirtschaftlichen Nutzung. Die Gemarkung Fatschenbrunn diente dabei aufgrund ihrer besonders gut erhaltenen historischen Kulturlandschaft als Modell für die gesamte Region. In den letzten beiden Jahren haben die Forscher und Forscherinnen aus Bamberg, unterstützt von Stu…	breit	Alle an Archäologie Interessierte können mitmachen	eng	Die Ergebnisse fließen in eine Datenbank ein und werden zusammen mit Daten aus den historischen Nachbardisziplinen ausgewertet, um ein Modell für die Veränderungen der Landschaft im Mittelalter und der Neuzeit zu entwerfen.	mittel	archäologisches Fundmaterial zusammen mit Archäologen und Studierenden sammeln, vermessen und kartieren.	distributed intelligence	Forschung		Entwertung eines Modell für die Veränderungen der Landschaft im Mittelalter und der Neuzeit	Grundlagenforschung
Citclops	Weltweit	ICBM, Universität Oldenburg	Ab Oktober 2013 (Abgeschlossen)	App	https://www.buergerschaffenwissen.de/projekt/citclops	Küstenzonen sind sensible Ökosysteme, die auch durch menschliche Einflüsse bedroht werden. Einfache Wassereigenschaften wie Farbe, Transparenz oder Fluoreszenz sind Indikatoren für Prozesse von gesellschaftlicher Bedeutung. Diese reichen von lokalen Ereignissen wie Eutrophierung (Überdüngung) bis hin zu globalen Veränderungen wie den Klimawandel. Durch die aktive Mitwirkung von Bürgerinnen und Bü…	breit	Alle Personen mit Smartphone ein anderes mobiles Endgerät	breit	Die gesammelten Daten sind für alle frei zugänglich	gering	Fotos aufnehmen und dies hochladen	crowdsourcing	Forschung		die Veränderungen von Meeren und Küsten erfassen und schädliche Einflüsse durch den Menschen sichtbar machen. Beitrag zum Schutz und Erhalt der Meeres- und Küstenumwelt	Angewandte Forschung
Jetzt ist Zähltag! 2018	Deutschland	ZEUS GmbH Öko-Institut e.V.	Ab März 2018 (Abgeschlossen)	Online-Plattform	https://www.buergerschaffenwissen.de/projekt/jetzt-ist-zaehltag-2018	Unsere Städte, Landschaften und Gewässer werden zunehmend mit Kunststoffen, Papier und anderen Abfällen vermüllt und somit stark belastet. Abfälle können auf verschiedenen Wegen in die Umwelt gelangen, z.B. durch das sogenannte „Littering“ (engl. für Vermüllen) hierbei wird Abfall außerhalb der dafür vorgesehenen Behälter weggeworfen bzw. liegengelassen. Ziel der Studie ist es, eine Bestandsaufna…	breit	Alle können mitmachen, Vorkenntnisse sind nicht notwendig	breit	Die Ergebnisse werden den Teilnehmenden im Rahmen einer Onlinekonferenz vorgestellt. Die Ergebnisse werden auf einer Webseite zur Verfügung gestellt	gering	die Art und Mengen des gelitterten Abfalls an einen gewählten öffentlichen Orten erfassen und die Daten hochladen	distributed intelligence	Forschung		Die Daten dienen als Grundlage für die Ableitung und Entwicklung von geeigneten Maßnahmen gegen Littering und als Literatur- und Onlinerecherche	Angewandte Forschung
Anymals + plants	Deutschland	Museum für Naturkunde Berlin Global Biodiversity Information Facility Friedrich-Alexander-Universität Erlangen-Nürnberg Alfred-Wegener-Institut für Polar- und Meeresforschung	Ab November 2011 (Abgeschlossen)	Online-Plattform , App	https://www.buergerschaffenwissen.de/projekt/anymals-plants	Anymals+plants ist ein dynamischer Naturbegleiter in Form einer Smartphone-Anwendung (App). Sie steht jedem kostenfrei und mehrsprachig zur Verfügung. So hat man immer einen mobilen, bebilderten Naturführer für die unmittelbare Umgebung - weltweit - in der Hosentasche. Man kann sich über Tiere und Planzen am aktuellen Standort informieren, eigene Sichtungen eintragen und sich mit anderen Teilnehm…	breit	Alle Personen mit Smartphone können mit machen	breit	Die Daten werden auf einer Webseite dargestellt und stehen allen zur Verfügung	gering	Fotos aufnehmen und hochladeng , Daten erfassen	distributed intelligence	Forschung		Beitrag zum Kenntnis-Gewinn zur räumlichen und zeitlichen Verbreitung von Arten	Angewandte Forschung																x
MyOSD - My Ocean Sampling Day 2016	Weltweit	Max Planck Institut für marine Mikrobiologie Bremen Bundesministerium für Bildung und Forschung Jacobs University Bremen	Ab Juni 2016 (Abgeschlossen)	Online-Plattform	https://www.buergerschaffenwissen.de/projekt/myosd-my-ocean-sampling-day-2016	Der Ocean Sampling Day (OSD) mit dem Citizen Science-Projekt MyOSD ist eine globale Initiative bei dem Wissenschaftler und Bürger*innen Hand in Hand arbeiten um das Wissen über unsere Ozeane und Meere zu vermehren. Veränderungen dieses Biotops beeinflussen unser aller Leben auf der Erde. Besonders wichtig für das Ökosystem, und ein Schlüssel für die Meeresforschung, sind die kleinsten Bewohner de…	breit	Alle können mit machen , Vorkenntnisse sind nicht notwendig	breit	Alle Daten werden ohne Beschränkungen für alle Wissenschaftler und Bürger*innen zur Verfügung gestellt.	gering	Wasserproben einnehmen und einsenden	distributed intelligence	Forschung		die Weltmeere und ihre kleinsten Bewohner besser verstehen. Die Daten werden für verschiedene wissenschaftliche Experimente verwendet	Angewandte Forschung															x
Wildschweine in der Stadt	Berlin-Brandenburg	Leibniz-Institut für Zoo- und Wildtierforschung (IZW) Interdisziplinärer Forschungsverbund (IFV) Biodiversität Berlin-Brandenburgisches Institut für Biodiversitätsforschung (BBIB)	Ab Juli 2013 (Abgeschlossen)	Online-Plattform , App ,melden per Post ist möglich	https://www.buergerschaffenwissen.de/projekt/wildschweine-der-stadt	Das Projekt „Wildschweine in der Stadt“ hat zum Ziel, die Lebensweise von Wildschweinen in Berlin zu untersuchen. Neben Fragen zur Nahrungsökologie, Reproduktion und Verwandtschaft werden die räumlichen und zeitlichen Bewegungsmuster der Tiere erfasst. Die Bewegungen von Wildschweinen in einer Stadt von der Größe Berlins sind dennoch für Wissenschaftler nur mit immensem Aufwand zu erfassen. Durch…	breit	Alle können mitmachen, Vorkenntnisse sind nicht notwendig	breit	die Daten werden in einem Portal gespeichert und stehen allen zur Verfügung	gering	lediglich Sichtungen von Wildschweine melden	crowdsourcing	Forschung		Unterstützung der Entwicklung eines effektiven Wildtiermanagements und dadurch Mensch-Tier Konflikte langfristig vermeiden.	Angewandte Forschung
WISSENSDINGE. Geschichten aus dem Naturkundemuseum Berlin	Berlin-Brandenburg	Museum für Naturkunde Berlin Gefördert vom Bundesministerium für Bildung und Forschung	Ab Juni 2013 (Abgeschlossen)	Online-Plattform	https://www.buergerschaffenwissen.de/projekt/wissensdinge-geschichten-aus-dem-naturkundemuseum-berlin	Die Dinge im Naturkundemuseum geben Auskunft über die wissenschaftliche Erforschung und Erschließung der Welt und prägen unser Bild der Natur. Sie bewegen eine Vielzahl an Menschen, die sie finden, sammeln, untersuchen, präparieren, vorführen, ausstellen und betrachten. Je nach Herangehensweise zeigt sich ein Ding ganz unterschiedlich. Das Forschungsprojekt Wissensdinge widmet sich diesen Perspek…	breit	Alle ,die Interesse haben Geschichten im Bezug auf das Naturkundemuseum Berlin zu erzählen , können mitmachen	breit	Am Schluss des Wissensdinge-Forschungsprojekt steht ein Buch, das ausgewählte Objektgeschichten einem breiten Publikum vorstellt. Die Ergebnisse stehen auf einer Webseite zur Verfügung	mittel	Geschichte erzählen	distributed intelligence	Frezeit,Bildung	Museum durch persönliche Geschichten interessanter machen		Angewandte Forschung	persönliche Geschichten zu Ausstellungsstücken erzählen und lesen				x

## Sheet: Source
Table S1: Sample of citizen science projects
Sample of projects and its descriptions based on Wissenschaft im Dialog gGmbH Projekte - Buerger schaffen Wissen Available online: https://www.buergerschaffenwissen.de/projekte (accessed on June 19, 2019)
Note: Texts are partly taken from the descriptions at Buerger schaffen Wissen
